# Supplementary material for: Diarylheptanoid analogues from the rhizomes ofZingiber officinaleand their anti-tumour activity
Source: Royal Society of Chemistry journal article supplement (doi:10.1039/d1ra03592d), 2021-01-01
Supplement: d1ra03592d1.pdf [file d1ra03592d1.pdf]

## Electronic Supplementary Information

### Diaryheptanoid analogues from the rhizomes of *Zingiber officinale* and their anti-tumor activity

Ting Li,<sup>a,†</sup> Da-bo Pan,<sup>a,b,†</sup> Qian-qian Pang<sup>a</sup>, Mi Zhou<sup>a</sup>, Xiao-jun Yao<sup>d</sup>, Xin-sheng Yao<sup>a</sup>,  
Hai-bo Li<sup>c,\*</sup>, Yang Yu<sup>a,\*</sup>

---

<sup>a</sup> Institute of Traditional Chinese Medicine & Natural Products, and Guangdong Province Key Laboratory of Pharmacodynamic Constituents of TCM and New Drugs Research, College of Pharmacy, Jinan University, Guangzhou 510632, P. R. China Yang Yu, E-mail: 1018yuyang@163.com, Xinsheng Yao, E-mail: tyaoxs@jnu.edu.cn Tel: +86 20 85221767, Fax: +86 20 85221559

<sup>b</sup> Department of Medical Technology, Qiandongnan Vocational & Technical College for Nationalities, Kaili, Guizhou 556000, P.R. china

<sup>c</sup> Kanion Pharmaceutical Co. Ltd, State Key Laboratory of New-tech for Chinese Medicine Pharmaceutical Process, Lianyungang 222001, People' Republic China.

<sup>d</sup> State Key Laboratory of Applied Organic Chemistry, Department of Chemistry, Lanzhou University, Lanzhou 730000, P. R. China

† These authors contributed equally to this work.

## 1. Extraction and isolation of compounds 9-23

The ethyl acetate extract was subjected to silica gel column chromatography with cyclohexane/EtOAc (97:3, 95:5, 9:1, 8:2, 7:3, 6:4 and 0:1, v/v) to produce 22 subfractions (Fr. A-V). Fr. O was subjected to a ODS column (CH<sub>3</sub>OH/H<sub>2</sub>O 60%, v/v) to yield 11 subfractions (Fr. O1-O11). Fr. O8, O9, and O10 were purified by semi-preparative HPLC to yield compounds **16** (8.7 mg, 33% ACN/H<sub>2</sub>O, v/v), **17** (16.1 mg, 33% ACN/H<sub>2</sub>O, v/v), **18** (935.9 mg, 53% CH<sub>3</sub>OH/H<sub>2</sub>O, v/v), and **9** (13.2 mg, 38% ACN/H<sub>2</sub>O, v/v), respectively. Fr. Q was chromatographed over a ODS column (CH<sub>3</sub>OH/H<sub>2</sub>O 60%, v/v) to yield 16 subfractions (Fr. Q1-Q16). Fr. Q6 and Q8 were further purified by semi-preparative HPLC to yield compounds **19** (48.0 mg, 25% ACN/H<sub>2</sub>O, v/v) and **20** (5.0 mg, 33% ACN/H<sub>2</sub>O, v/v), respectively. Fr. Q7 was preliminarily purified by semi-preparative HPLC (30% ACN/H<sub>2</sub>O, v/v), and then further purified by semi-preparative HPLC to afford compounds **15** (14.3 mg, 32% ACN/H<sub>2</sub>O, v/v), **22** (1.9 mg, 32% ACN/H<sub>2</sub>O, v/v), **21** (1.1 mg, 32% ACN/H<sub>2</sub>O, v/v), and **14** (1.1 mg, 35% ACN/H<sub>2</sub>O, v/v). Similarly, Fr. R was put on a ODS column (CH<sub>3</sub>OH/H<sub>2</sub>O 60%, v/v) to yield 9 subfractions (Fr. R1-R9). Fr. R4 was further purified by semi-preparative HPLC to yield compound **13** (133.4 mg, 25% ACN/H<sub>2</sub>O, v/v). Fr. R6 and R8 were subjected to a silica gel column (CH<sub>2</sub>Cl<sub>2</sub>/Aceton 95:5, v/v) individually, and further purified by semi-preparative HPLC to afford compounds **10** (5.0 mg, 33% ACN/H<sub>2</sub>O, v/v), **23** (3.4 mg, 30% ACN/H<sub>2</sub>O, v/v), **11** (25.6 mg, 36% ACN/H<sub>2</sub>O, v/v), and **12** (31.1 mg, 33% ACN/H<sub>2</sub>O, v/v), respectively.

## 2. Spectroscopic data of isolated new compounds

*cyclogingerenone A (1)* yellow oil;  $[\alpha]_D^{25} +22.7$  (c 0.3, CH<sub>3</sub>OH); UV (MeOH)  $\lambda_{\max}$  nm (log  $\epsilon$ ): 205 (4.32), 281 (3.56); IR (KBr)  $\nu_{\max}$  3431, 2923, 2848, 1684, 1652, 1612, 1517, 1509, 1454, 1274, 1202, 1147, 1089, 1035 cm<sup>-1</sup>; <sup>1</sup>H-NMR (600 MHz, in CD<sub>3</sub>OD) and <sup>13</sup>C-NMR (150 MHz, in CD<sub>3</sub>OD) data see Table 1; HR-ESI-MS (positive)  $m/z$  355.1553 [M+H]<sup>+</sup> (calculated for C<sub>21</sub>H<sub>23</sub>O<sub>5</sub>, 355.1545).

*cyclogingerenone B (2)* yellow oil;  $[\alpha]_D^{25} -10.7$  (c 0.2, CH<sub>3</sub>OH); UV (MeOH)  $\lambda_{\max}$  nm (log  $\epsilon$ ): 205 (4.15), 280 (3.23); IR (KBr)  $\nu_{\max}$  3446, 2917, 2848, 1736, 1675, 1606, 1509,

1456, 1425, 1306, 1268, 1237, 1208, 1156, 1083, 827  $\text{cm}^{-1}$ ;  $^1\text{H-NMR}$  (600 MHz, in  $\text{CDCl}_3$ ) and  $^{13}\text{C-NMR}$  (150 MHz, in  $\text{CDCl}_3$ ) data see Table 1; HR-ESI-MS (positive)  $m/z$  355.1553  $[\text{M}+\text{H}]^+$  (calculated for  $\text{C}_{21}\text{H}_{23}\text{O}_5$ , 355.1545).

**cyclogingerenone C (3)** yellow oil;  $[\alpha]_D^{25} +2.7$  ( $c$  2.5,  $\text{CHCl}_3$ ); UV (MeOH)  $\lambda_{\text{max}}$  nm ( $\log \epsilon$ ): 207 (4.30), 277 (3.42); IR (KBr)  $\nu_{\text{max}}$  3333, 2932, 2920, 2848, 1687, 1600, 1517, 1506, 1454, 1419, 1358, 1266, 1020, 1150, 1078, 1035, 839  $\text{cm}^{-1}$ ;  $^1\text{H-NMR}$  (600 MHz, in  $\text{CDCl}_3$ ) and  $^{13}\text{C-NMR}$  (150 MHz, in  $\text{CDCl}_3$ ) data see Table 1; HR-ESI-MS (positive)  $m/z$  373.1654  $[\text{M}+\text{H}]^+$  (calculated for  $\text{C}_{21}\text{H}_{25}\text{O}_6$ , 373.1651).

**(5R)-5-ethoxyhexahydrocurcumin (4)** yellow oil;  $[\alpha]_D^{25} -10.7$  ( $c$  0.6,  $\text{CHCl}_3$ ); UV (MeOH)  $\lambda_{\text{max}}$  nm ( $\log \epsilon$ ): 203 (4.19), 225 (3.94), 282 (3.59); IR (KBr)  $\nu_{\text{max}}$  3453, 2935, 1705, 1607, 1514, 1456, 1367, 1270, 1151, 813, 793  $\text{cm}^{-1}$ ;  $^1\text{H-NMR}$  (600 MHz, in  $\text{CD}_3\text{OD}$ ) and  $^{13}\text{C-NMR}$  (150 MHz, in  $\text{CD}_3\text{OD}$ ) data see Table 2; HR-ESI-MS (positive)  $m/z$  403.2110  $[\text{M}+\text{H}]^+$  (calculated for  $\text{C}_{23}\text{H}_{31}\text{O}_6$ , 403.2121).

**(5R)-5-methoxy-1-(4-hydroxy-3,5-dimethoxyphenyl)-7-(4-hydroxy-3-methoxyphenyl) heptan-3-one (5)** yellow oil;  $[\alpha]_D^{25} -8.3$  ( $c$  0.6,  $\text{CHCl}_3$ ); UV (MeOH)  $\lambda_{\text{max}}$  nm ( $\log \epsilon$ ): 203 (4.20), 278 (3.42), 351 (3.26); IR (KBr)  $\nu_{\text{max}}$  3443, 2981, 2848, 1739, 1515, 1460, 1428, 1271, 1240, 1116, 1033, 726  $\text{cm}^{-1}$ ;  $^1\text{H-NMR}$  (600 MHz, in  $\text{CDCl}_3$ ) and  $^{13}\text{C-NMR}$  (150 MHz, in  $\text{CDCl}_3$ ) data see Table 2; HR-ESI-MS (positive)  $m/z$  419.2060  $[\text{M}+\text{H}]^+$  (calculated for  $\text{C}_{23}\text{H}_{31}\text{O}_7$ , 419.2070).

**(E)-7-(3,4-dihydroxyphenyl)-1-(3,4,5-trimethoxyphenyl) hept-4-en-3-one (6)** yellow oil; UV (MeOH)  $\lambda_{\text{max}}$  nm ( $\log \epsilon$ ): 205 (4.27), 278 (3.35); IR (KBr)  $\nu_{\text{max}}$  3479, 2932, 1713, 1698, 1591, 1511, 1456, 1425, 1280, 1240, 1127, 1006  $\text{cm}^{-1}$ ;  $^1\text{H-NMR}$  (600 MHz, in  $\text{CDCl}_3$ ) and  $^{13}\text{C-NMR}$  (150 MHz, in  $\text{CDCl}_3$ ) data see Table 2; HR-ESI-MS (positive)  $m/z$  387.1794  $[\text{M}+\text{H}]^+$  (calculated for  $\text{C}_{22}\text{H}_{27}\text{O}_6$ , 387.1808).

**(3R)-3-acetoxy-7-(3,4-dihydroxyphenyl)-1-(4-hydroxy-3-methoxyphenyl) heptane (7)** yellow oil;  $[\alpha]_D^{25} -10.5$  ( $c$  0.6,  $\text{CHCl}_3$ ); UV (MeOH)  $\lambda_{\text{max}}$  nm ( $\log \epsilon$ ): 202 (4.01), 280 (3.41); IR (KBr)  $\nu_{\text{max}}$  3444, 2932, 2858, 1728, 1719, 1515, 1459, 1376, 1267, 1024, 950  $\text{cm}^{-1}$ ;  $^1\text{H-NMR}$  (600 MHz, in  $\text{CDCl}_3$ ) and  $^{13}\text{C-NMR}$  (150 MHz, in  $\text{CDCl}_3$ ) data see

Table 3; HR-ESI-MS (positive)  $m/z$  411.1767  $[M + Na]^+$  (calculated for  $C_{22}H_{28}O_6Na$ , 411.1784).

**(3R)-3-acetoxy-7-(3,4-dihydroxyphenyl)-1-(4-hydroxy-3,5-dimethoxyphenyl)**

*heptane* (**8**) yellow oil;  $[\alpha]_D^{25}$  -16.9 ( $c$  0.6,  $CHCl_3$ ); UV (MeOH)  $\lambda_{max}$  nm ( $\log \epsilon$ ): 205 (4.37), 280 (3.53); IR (KBr)  $\nu_{max}$  3316, 2921, 2848, 1730, 1716, 1609, 1520, 1460, 1373, 1249, 1220, 1116  $cm^{-1}$ ;  $^1H$ -NMR (600 MHz, in  $CDCl_3$ ) and  $^{13}C$ -NMR (150 MHz, in  $CDCl_3$ ) data see Table 3; HR-ESI-MS (positive)  $m/z$  387.1794  $[M + Na]^+$  (calculated for  $C_{23}H_{30}O_7Na$ , 387.1808).

**Figure caption:**

- Figure S1.** UV spectrum of compound **1**
- Figure S2.** HR-ESI-MS spectrum of compound **1**
- Figure S3.** IR spectrum of compound **1**
- Figure S4.**  $^1H$ -NMR spectrum of compound **1**
- Figure S5.**  $^{13}C$ -NMR spectrum of compound **1**
- Figure S6.**  $^{13}C$ -NMR and DEPT 135 spectra of compound **1**
- Figure S7.**  $^1H$ - $^1H$  COSY spectrum of compound **1**
- Figure S8.** HSQC spectrum of compound **1**
- Figure S9.** HMBC spectrum of compound **1**
- Figure S10.** UV spectrum of compound **2**
- Figure S11.** HR-ESI-MS spectrum of compound **2**
- Figure S12.** IR spectrum of compound **2**
- Figure S13.**  $^1H$ -NMR spectrum of compound **2**
- Figure S14.**  $^{13}C$ -NMR spectrum of compound **2**
- Figure S15.**  $^{13}C$ -NMR and DEPT 135 spectra of compound **2**
- Figure S16.**  $^1H$ - $^1H$  COSY spectrum of compound **2**
- Figure S17.** HSQC spectrum of compound **2**
- Figure S18.** HMBC spectrum of compound **2**
- Figure S19.** UV spectrum of compound **3**
- Figure S20.** HR-ESI-MS spectrum of compound **3**
- Figure S21.** IR spectrum of compound **3**
- Figure S22.**  $^1H$ -NMR spectrum of compound **3**
- Figure S23.**  $^{13}C$ -NMR spectrum of compound **3**
- Figure S24.**  $^{13}C$ -NMR and DEPT 135 spectra of compound **3**
- Figure S25.**  $^1H$ - $^1H$  COSY spectrum of compound **3**
- Figure S26.** HSQC spectrum of compound **3**
- Figure S27.** HMBC spectrum of compound **3**
- Figure S28.** UV spectrum of compound **4**
- Figure S29.** HR-ESI-MS spectrum of compound **4**

**Figure S30.** IR spectrum of compound **4**  
**Figure S31.**  $^1\text{H}$ -NMR spectrum of compound **4**  
**Figure S32.**  $^{13}\text{C}$ -NMR spectrum of compound **4**  
**Figure S33.**  $^{13}\text{C}$ -NMR and DEPT 135 spectra of compound **4**  
**Figure S34.**  $^1\text{H}$ - $^1\text{H}$  COSY spectrum of compound **4**  
**Figure S35.** HSQC spectrum of compound **4**  
**Figure S36.** HMBC spectrum of compound **4**  
**Figure S37.** UV spectrum of compound **5**  
**Figure S38.** HR-ESI-MS spectrum of compound **5**  
**Figure S39.** IR spectrum of compound **5**  
**Figure S40.**  $^1\text{H}$ -NMR spectrum of compound **5**  
**Figure S41.**  $^{13}\text{C}$ -NMR spectrum of compound **5**  
**Figure S42.**  $^1\text{H}$ - $^1\text{H}$  COSY spectrum of compound **5**  
**Figure S43.** HSQC spectrum of compound **5**  
**Figure S44.** HMBC spectrum of compound **5**  
**Figure S45.** UV spectrum of compound **6**  
**Figure S46.** HR-ESI-MS spectrum of compound **6**  
**Figure S47.** IR spectrum of compound **6**  
**Figure S48.**  $^1\text{H}$ -NMR spectrum of compound **6**  
**Figure S49.**  $^{13}\text{C}$ -NMR spectrum of compound **6**  
**Figure S50.**  $^1\text{H}$ - $^1\text{H}$  COSY spectrum of compound **6**  
**Figure S51.** HSQC spectrum of compound **6**  
**Figure S52.** HMBC spectrum of compound **6**  
**Figure S53.** UV spectrum of compound **7**  
**Figure S54.** HR-ESI-MS spectrum of compound **7**  
**Figure S55.** IR spectrum of compound **7**  
**Figure S56.**  $^1\text{H}$ -NMR spectrum of compound **7**  
**Figure S57.**  $^{13}\text{C}$ -NMR spectrum of compound **7**  
**Figure S58.**  $^1\text{H}$ - $^1\text{H}$  COSY spectrum of compound **7**  
**Figure S59.** HSQC spectrum of compound **7**  
**Figure S60.** HMBC spectrum of compound **7**  
**Figure S61.** UV spectrum of compound **8**  
**Figure S62.** HR-ESI-MS spectrum of compound **8**  
**Figure S63.** IR spectrum of compound **8**  
**Figure S64.**  $^1\text{H}$ -NMR spectrum of compound **8**  
**Figure S65.**  $^{13}\text{C}$ -NMR spectrum of compound **8**  
**Figure S66.**  $^{13}\text{C}$ -NMR and DEPT 135 spectra of compound **8**  
**Figure S67.**  $^1\text{H}$ - $^1\text{H}$  COSY spectrum of compound **8**  
**Figure S68.** HSQC spectrum of compound **8**  
**Figure S69.** HMBC spectrum of compound **8**  
**Figure S70.** The structures of compounds **3a** and **3b**.  
**Figure S71.** Experimental and calculated CD spectra of compound **3**  
**Figure S72.** Effects of compounds **6**, **17**, and **18** on the protein expression of ATM, ATR, P53, and CHK1 in A549 cell line. A549 cells were pretreated with different concentrations of

compounds **6**, **17**, and **18** for 24 h. The cells were lysed with RIPA buffer and the protein levels for total ATM, ATR, P53, and CHK1 were measured by using immunoblot analysis.  $\beta$ -Actin was used as a loading control. CPT was used as a positive control. And all of the experiments were repeated three times independently.

### 3. Spectra of compounds 1-8

#### Compound 1

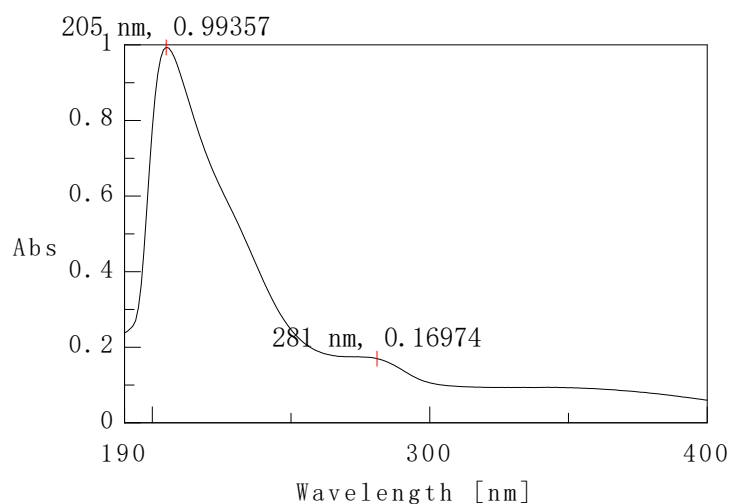

**Figure S1. UV spectrum of compound 1**

#### Elemental Composition Report

Page 1

#### Single Mass Analysis

Tolerance = 5.0 PPM / DBE: min = -1.5, max = 50.0

Element prediction: Off

Number of isotope peaks used for i-FIT = 3

Monoisotopic Mass, Even Electron Ions

335 formula(e) evaluated with 1 results within limits (all results (up to 1000) for each mass)

Elements Used:

C: 0-55 H: 0-100 N: 0-8 O: 0-8

Z0207-1B

2019031122 188 (1.518)

1: TOF MS ES+  
8.37e+005

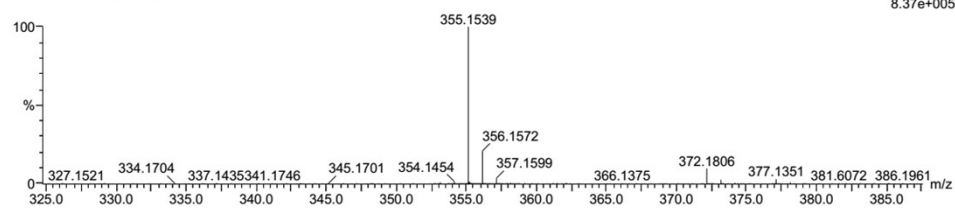

Minimum: -1.5  
Maximum: 50.0

| Mass     | Calc. Mass | mDa  | PPM  | DBE  | i-FIT | Conf(%) | Formula    |
|----------|------------|------|------|------|-------|---------|------------|
| 355.1539 | 355.1545   | -0.6 | -1.7 | 10.5 | 675.0 | n/a     | C21 H23 O5 |

**Figure S2. HR-ESI-MS spectrum of compound 1**

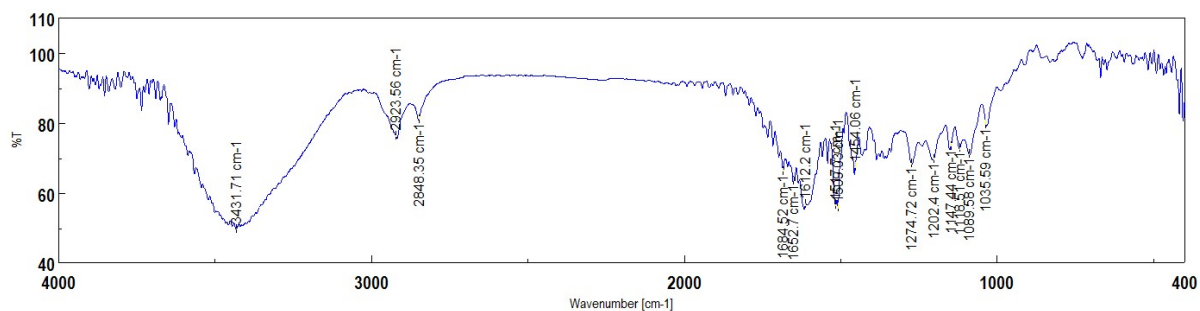

Figure S3. IR spectrum of compound 1

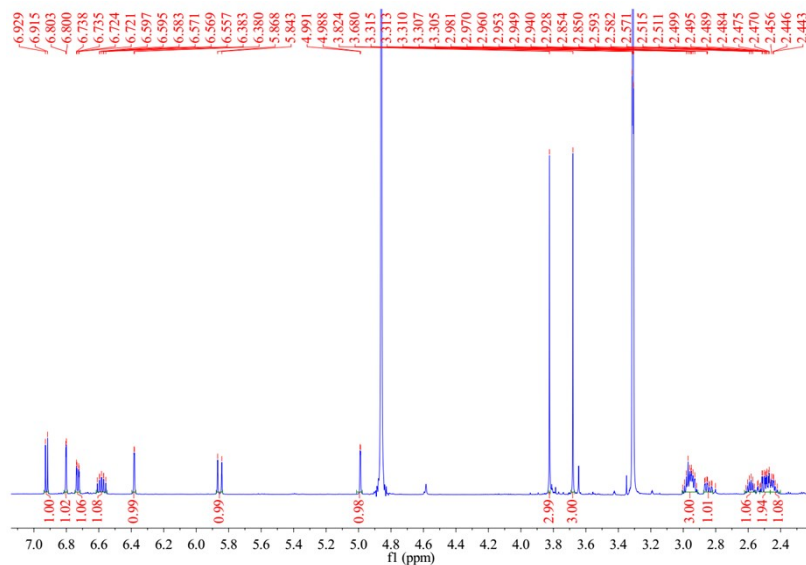

Figure S4. <sup>1</sup>H-NMR spectrum of compound 1

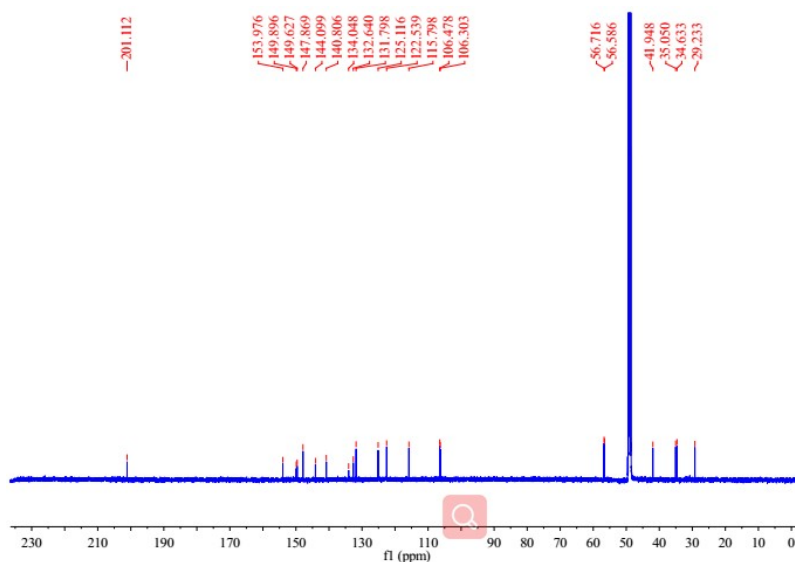

Figure S5. <sup>13</sup>C-NMR spectrum of compound 1

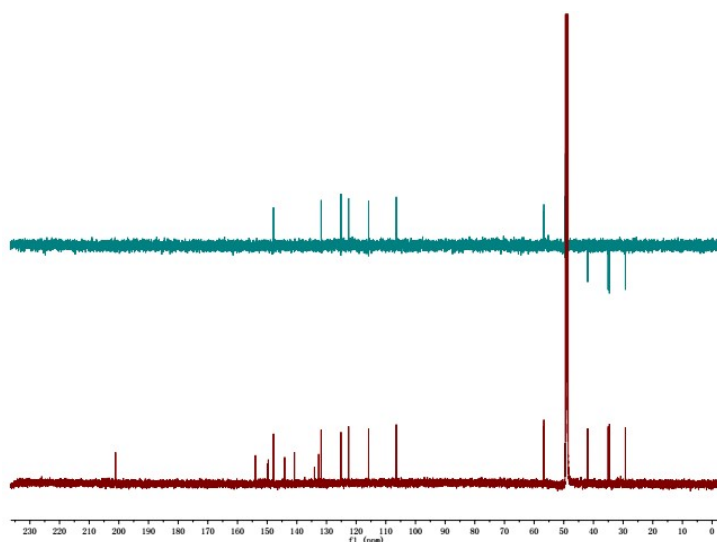

Figure S6.  $^{13}\text{C}$ -NMR and DEPT 135 spectra of compound 1

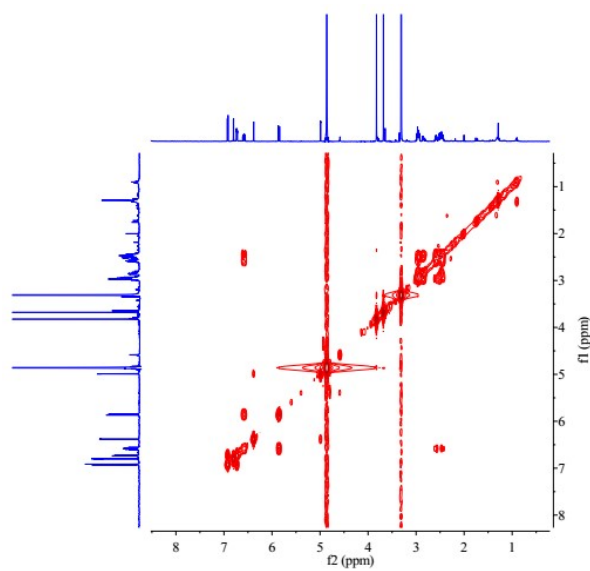

Figure S7.  $^1\text{H}$ - $^1\text{H}$  COSY spectrum of compound 1

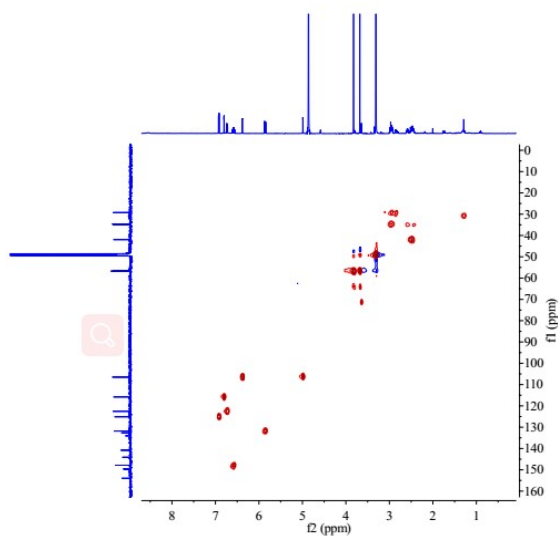

Figure S8. HSQC spectrum of compound 1



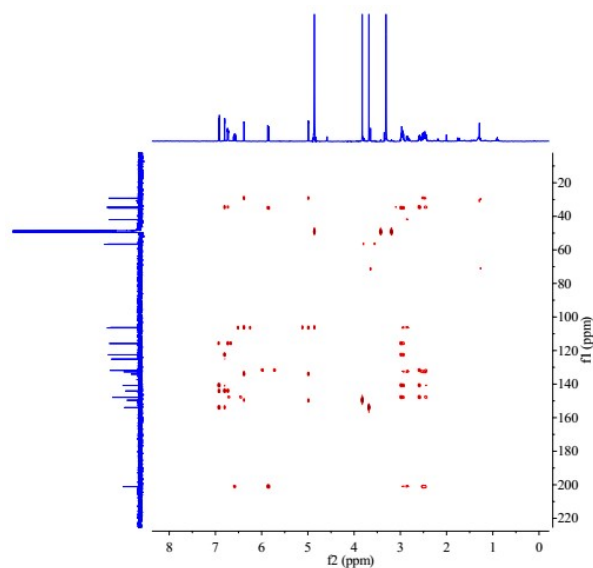

**Figure S9. HMBC spectrum of compound 1  
Compound 2**

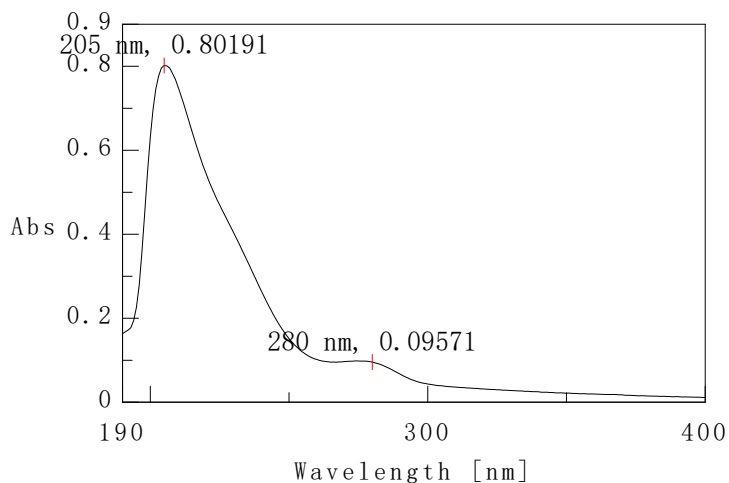

**Figure S10. UV spectrum of compound 2**

**Elemental Composition Report**

Page 1

**Single Mass Analysis**

Tolerance = 5.0 PPM / DBE: min = -1.5, max = 50.0

Element prediction: Off

Number of isotope peaks used for i-FIT = 3

Monoisotopic Mass, Even Electron Ions

137 formula(e) evaluated with 1 results within limits (all results (up to 1000) for each mass)

Elements Used:

C: 0-50 H: 0-100 O: 0-30 Na: 0-1

Z0207-2B

20190225-46 178 (1.444)

1: TOF MS ES+  
1.90e+006

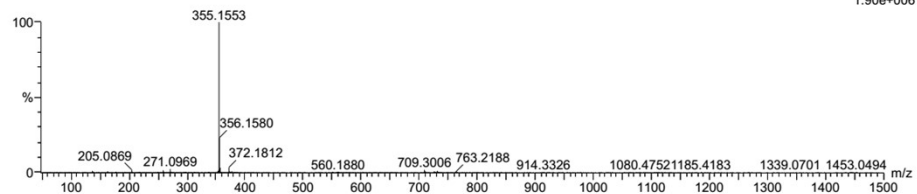

Minimum: -1.5

Maximum: 50.0

| Mass     | Calc. Mass | mDa | PPM | DBE  | i-FIT | Conf (%) | Formula    |
|----------|------------|-----|-----|------|-------|----------|------------|
| 355.1553 | 355.1545   | 0.8 | 2.3 | 10.5 | 767.4 | n/a      | C21 H23 O5 |

**Figure S11. HR-ESI-MS spectrum of compound 2**

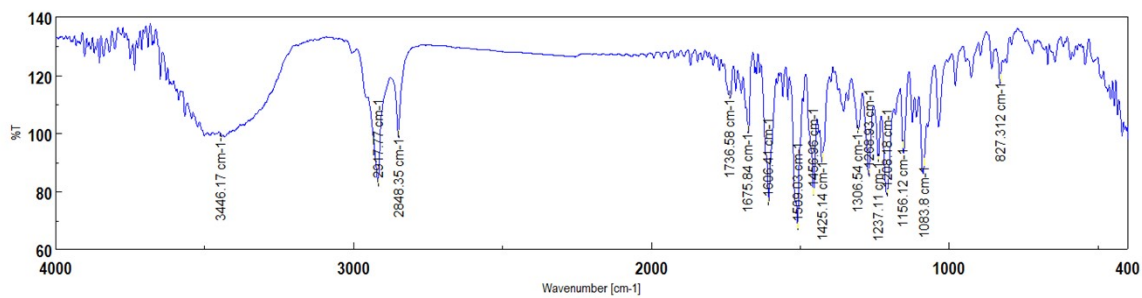

Figure S12. IR spectrum of compound 2

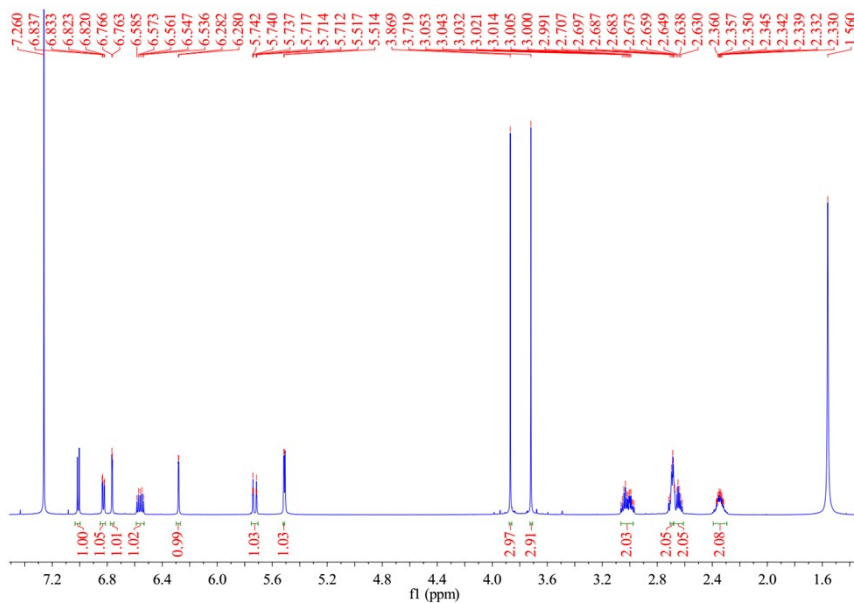

Figure S13. <sup>1</sup>H-NMR spectrum of compound 2

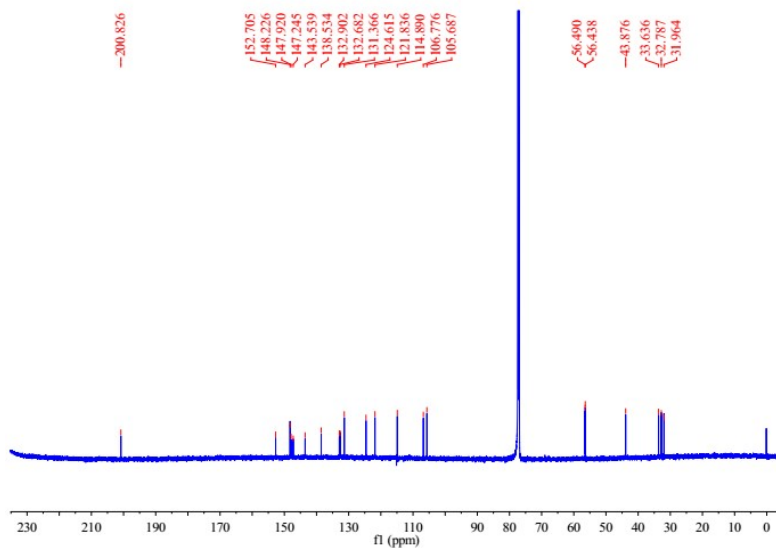

Figure S14. <sup>13</sup>C-NMR spectrum of compound 2

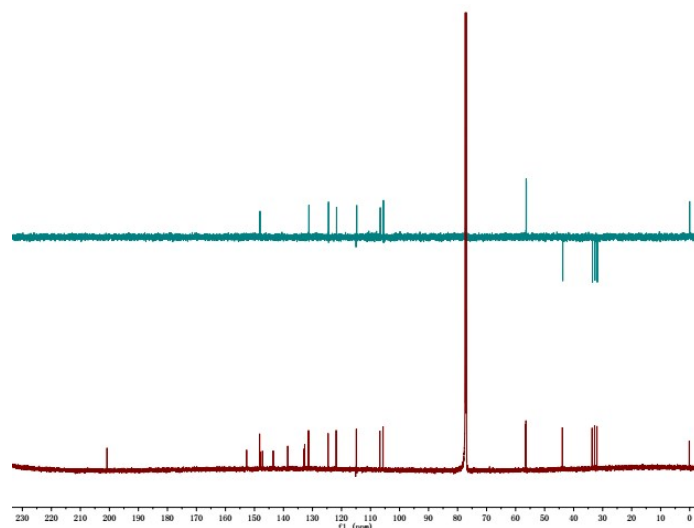

**Figure S15.**  $^{13}\text{C}$ -NMR and DEPT 135 spectra of compound 2

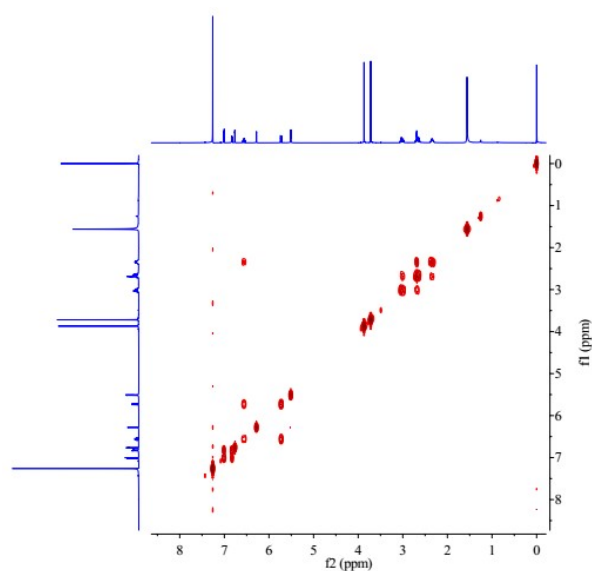

**Figure S16.**  $^1\text{H}$ - $^1\text{H}$  COSY spectrum of compound 2

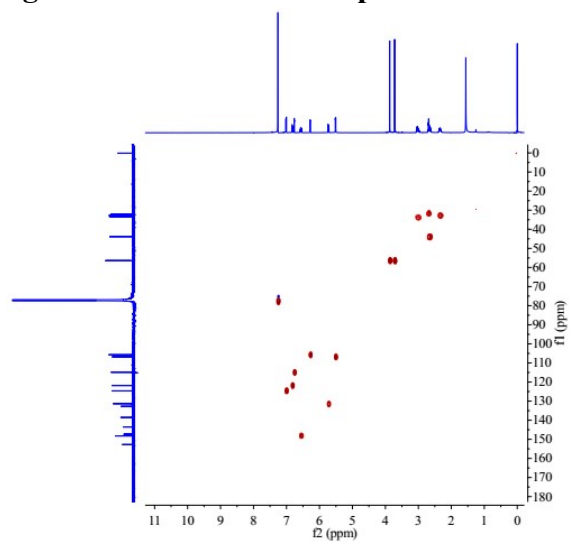

**Figure S17.** HSQC spectrum of compound 2

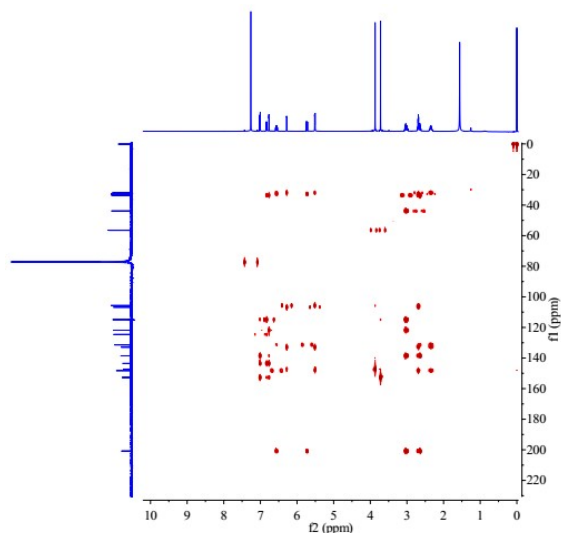

**Figure S18. HMBC spectrum of compound 2  
Compound 3**

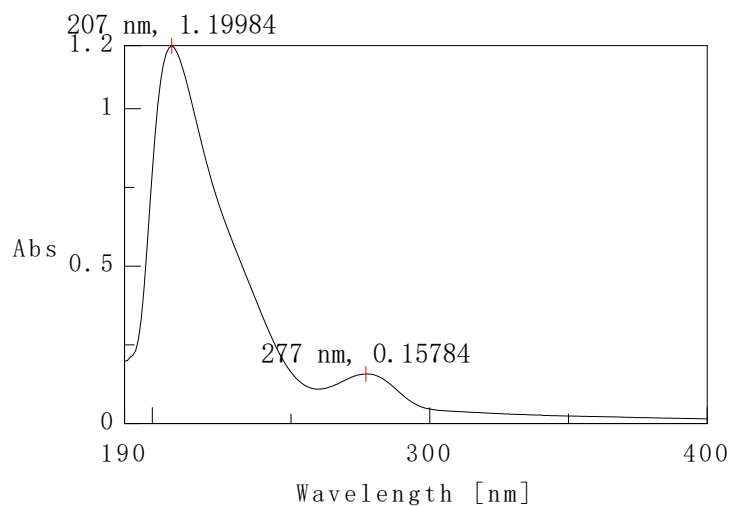

**Figure S19. UV spectrum of compound 3**

**Elemental Composition Report**

Page 1

**Single Mass Analysis**

Tolerance = 5.0 mDa / DBE: min = -1.5, max = 50.0

Element prediction: Off

Number of isotope peaks used for i-FIT = 3

Monoisotopic Mass, Even Electron Ions

77 formula(e) evaluated with 1 results within limits (up to 50 best isotopic matches for each mass)

Elements Used:

C: 0-500 H: 0-1000 O: 0-200

Z02R4G2

Z0191118010 153 (1.246)

1: TOF MS ES+  
6.52e+005

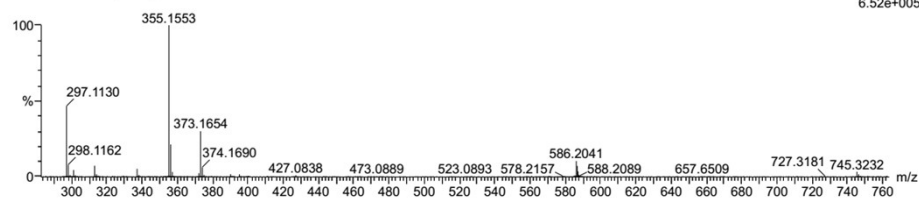

Minimum: -1.5  
Maximum: 50.0

| Mass     | Calc. Mass | mDa | PPM | DBE | i-FIT | Conf(%) | Formula    |
|----------|------------|-----|-----|-----|-------|---------|------------|
| 373.1654 | 373.1651   | 0.3 | 0.8 | 9.5 | 354.1 | n/a     | C21 H25 O6 |

**Figure S20. HR-ESI-MS spectrum of compound 3**

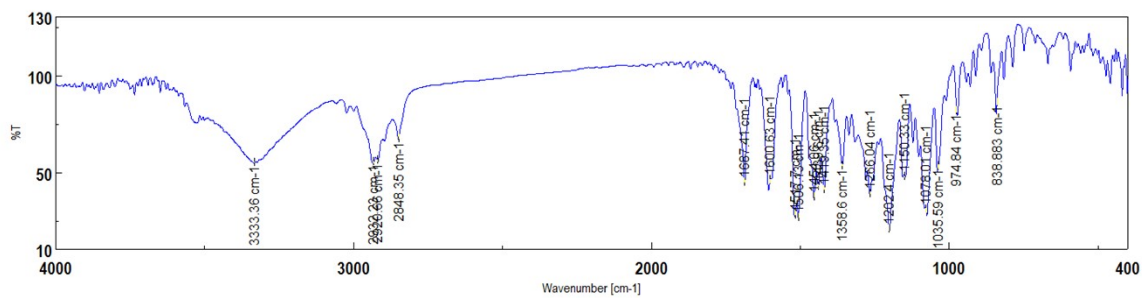

**Figure S21. IR spectrum of compound 3**

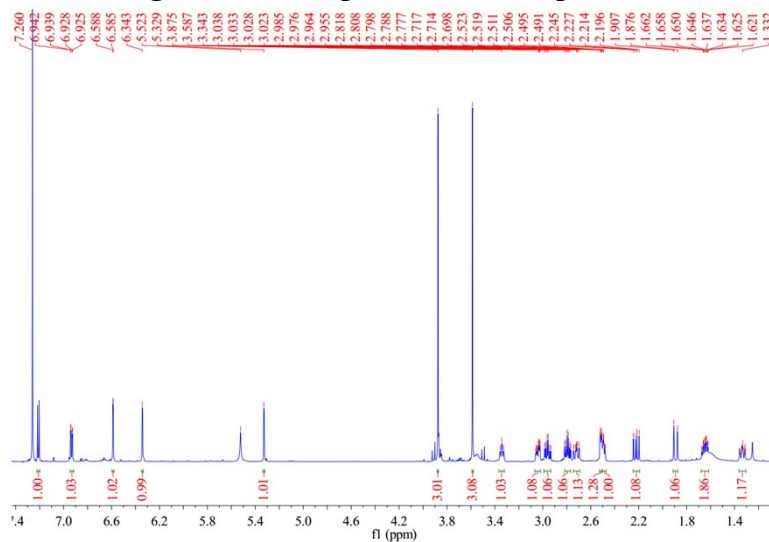

**Figure S22. <sup>1</sup>H-NMR spectrum of compound 3**

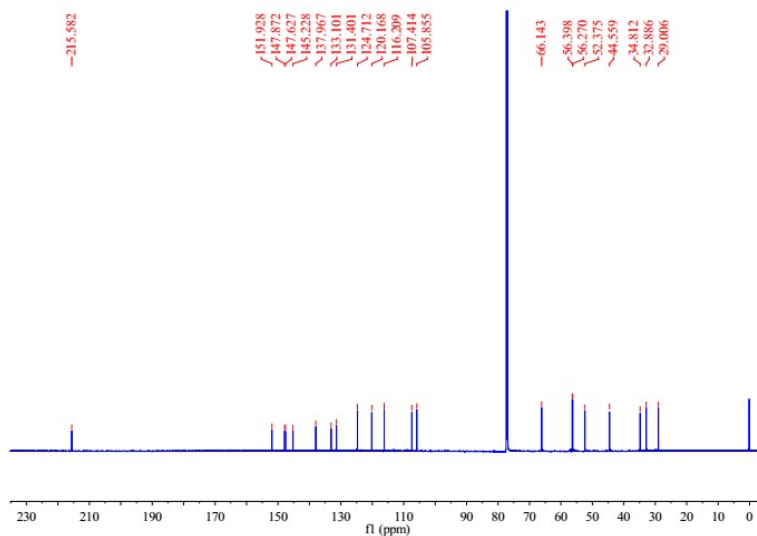

**Figure S23. <sup>13</sup>C-NMR spectrum of compound 3**

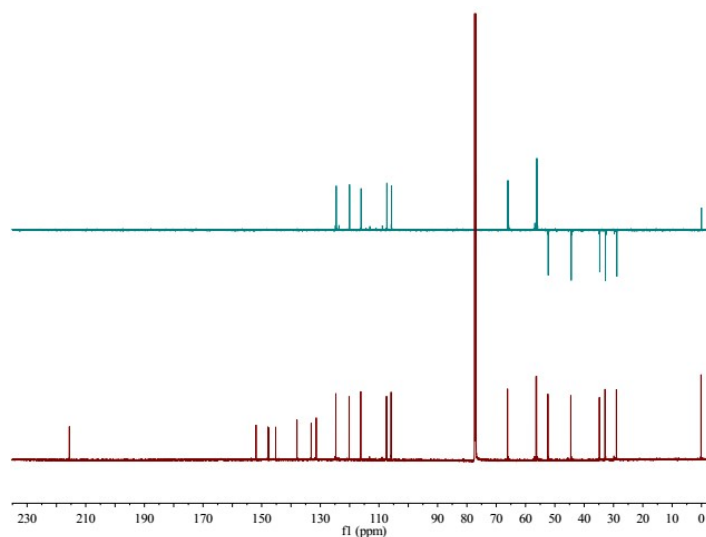

**Figure S24.**  $^{13}\text{C}$ -NMR and DEPT 135 spectra of compound 3

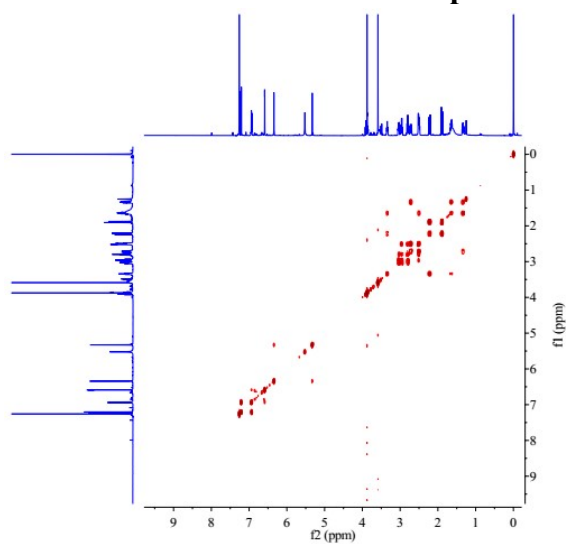

**Figure S25.**  $^1\text{H}$ - $^1\text{H}$  COSY spectrum of compound 3

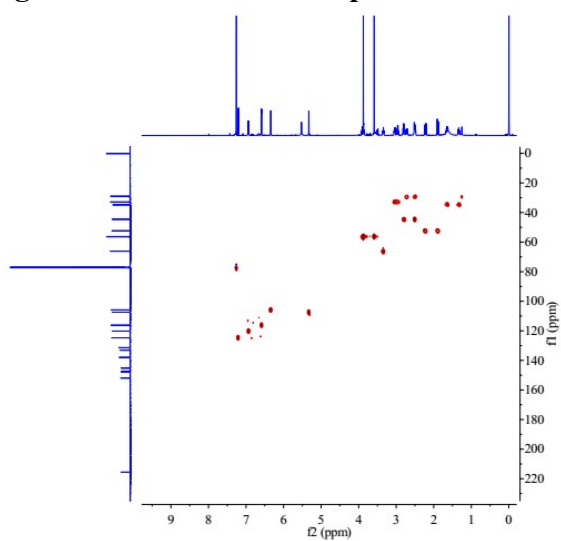

**Figure S26.** HSQC spectrum of compound 3

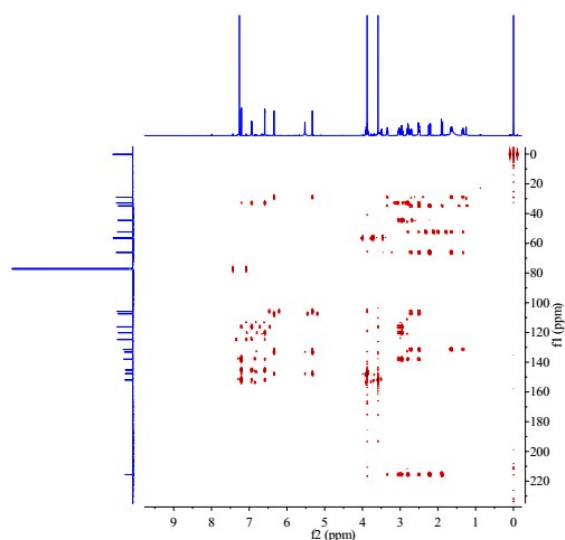

**Figure S27. HMBC spectrum of compound 3  
Compound 4**

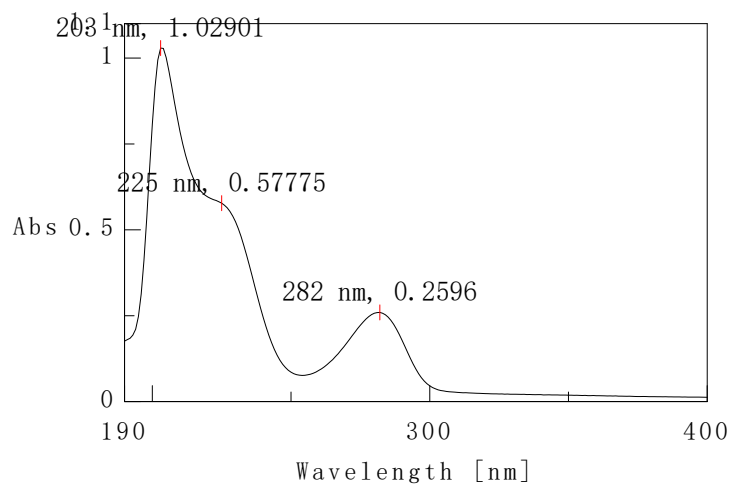

**Figure S28. UV spectrum of compound 4**

**Elemental Composition Report**

Page 1

**Single Mass Analysis**

Tolerance = 10.0 PPM / DBE: min = -1.5, max = 50.0

Element prediction: Off

Number of isotope peaks used for i-FIT = 3

Monoisotopic Mass, Even Electron Ions

92 formula(e) evaluated with 1 results within limits (all results (up to 1000) for each mass)

Elements Used:

C: 0-60 H: 0-100 O: 0-30

ZO209C1

20190610008 195 (1.582)

1: TOF MS ES+  
1.05e+005

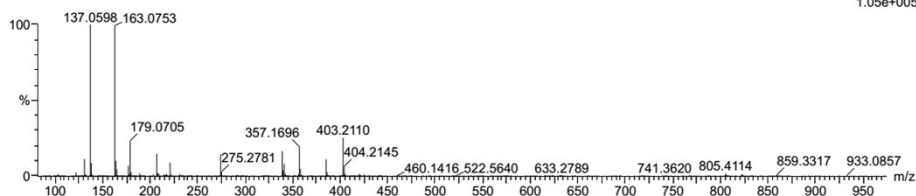

Minimum:  
Maximum:

-1.5  
10.0 10.0 50.0

| Mass     | Calc. Mass | mDa  | PPM  | DBE | i-FIT | Conf (%) | Formula    |
|----------|------------|------|------|-----|-------|----------|------------|
| 403.2110 | 403.2121   | -1.1 | -2.7 | 8.5 | 156.5 | n/a      | C23 H31 O6 |

**Figure S29. HR-ESI-MS spectrum of compound 4**

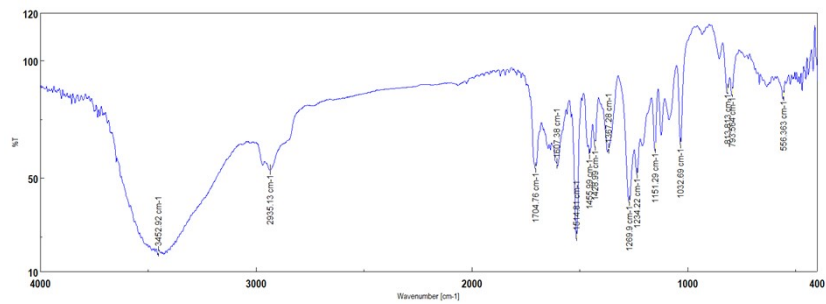

Figure S30. IR spectrum of compound 4

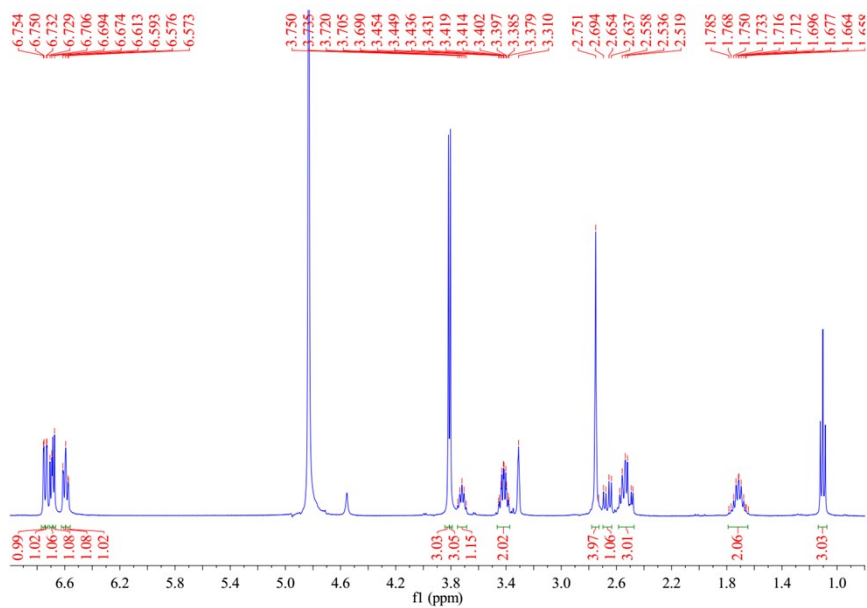

Figure S31. <sup>1</sup>H-NMR spectrum of compound 4

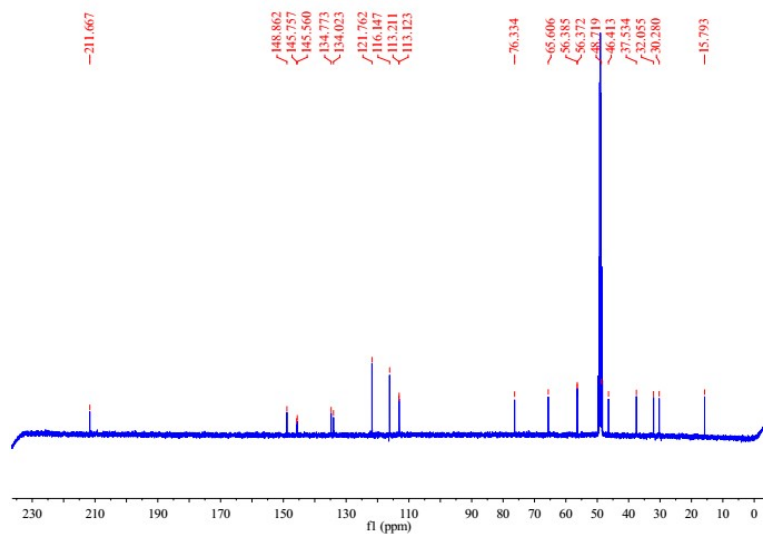

Figure S32. <sup>13</sup>C-NMR spectrum of compound 4



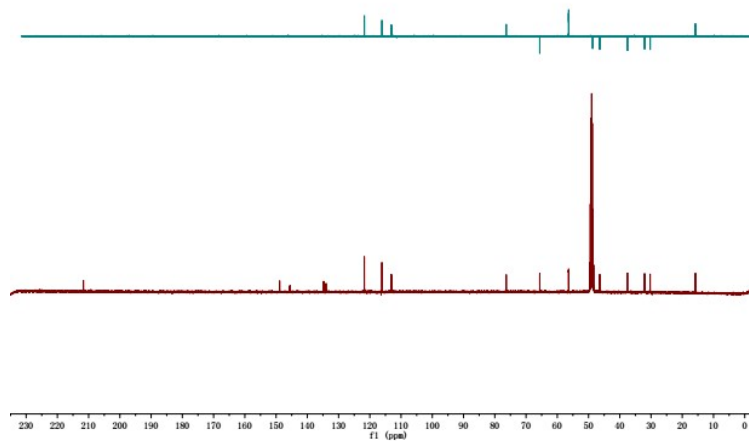

Figure S33.  $^{13}\text{C}$ -NMR and DEPT 135 spectra of compound 4

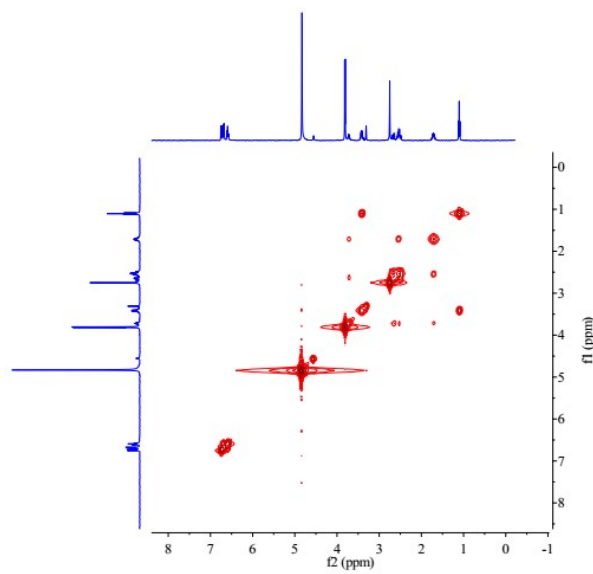

Figure S34.  $^1\text{H}$ - $^1\text{H}$  COSY spectrum of compound 4

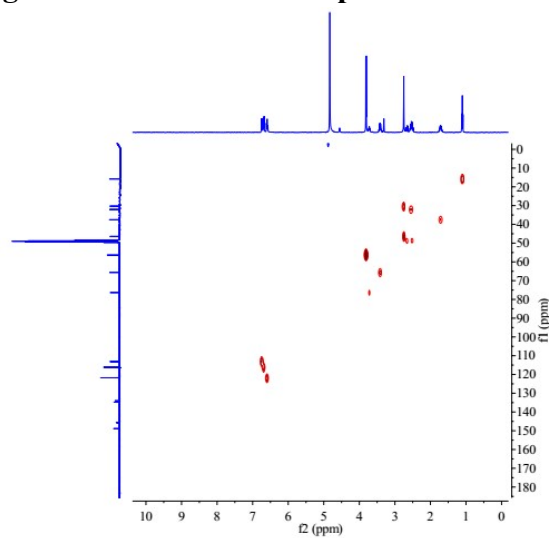

Figure S35. HSQC spectrum of compound 4

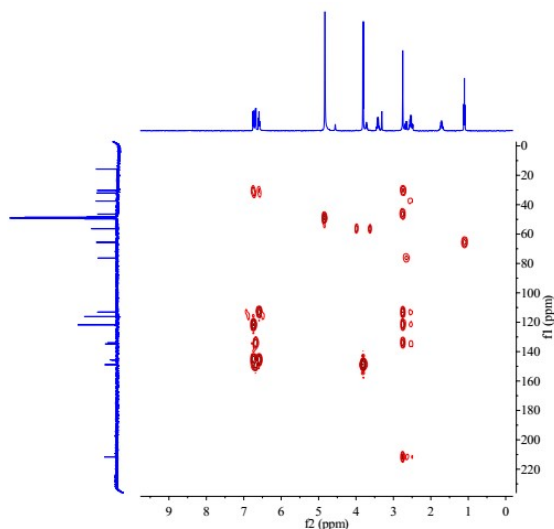

**Figure S36. HMBC spectrum of compound 4  
Compound 5**

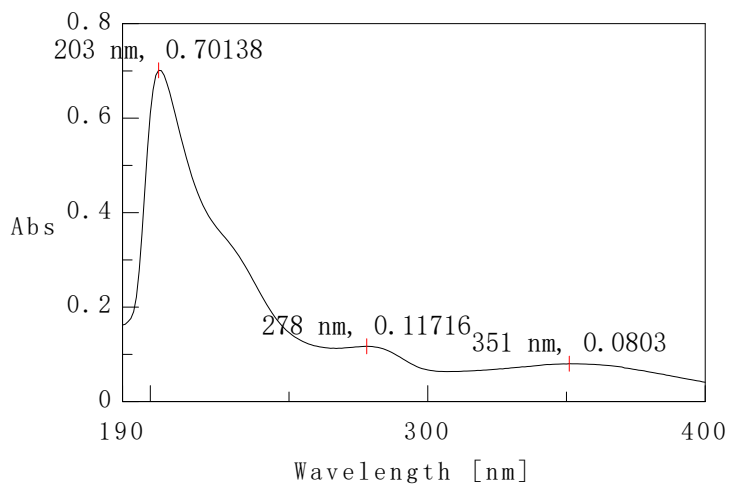

**Figure S37. UV spectrum of compound 5**

**Elemental Composition Report**

**Single Mass Analysis**

Tolerance = 10.0 PPM / DBE: min = -1.5, max = 50.0

Element prediction: Off

Number of isotope peaks used for i-FIT = 3

Monoisotopic Mass, Even Electron Ions

98 formula(e) evaluated with 1 results within limits (all results (up to 1000) for each mass)

Elements Used:

C: 0-50 H: 0-80 O: 0-30

Z02Q711

20191028-29 181 (1.466)

1: TOF MS ES+  
2.92e+004

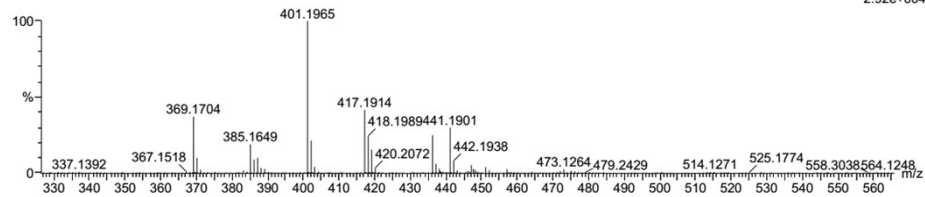

Minimum: -1.5

Maximum: 10.0 10.0 50.0

| Mass     | Calc. Mass | mDa  | PPM  | DBE | i-FIT | Conf (%) | Formula    |
|----------|------------|------|------|-----|-------|----------|------------|
| 419.2060 | 419.2070   | -1.0 | -2.4 | 8.5 | 109.0 | n/a      | C23 H31 O7 |

**Figure S38. HR-ESI-MS spectrum of compound 5**

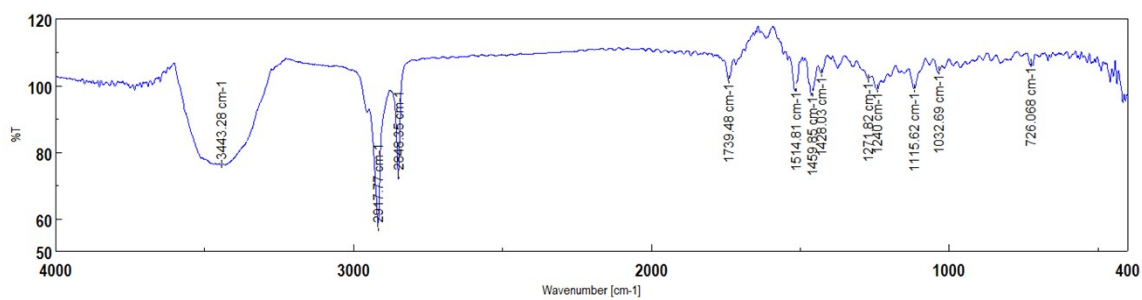

Figure S39. IR spectrum of compound 5

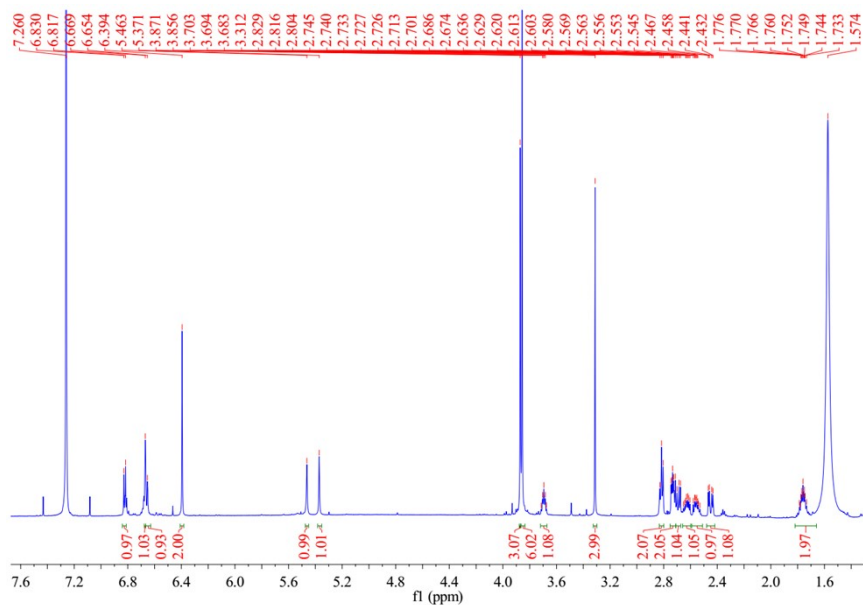

Figure S40. <sup>1</sup>H-NMR spectrum of compound 5

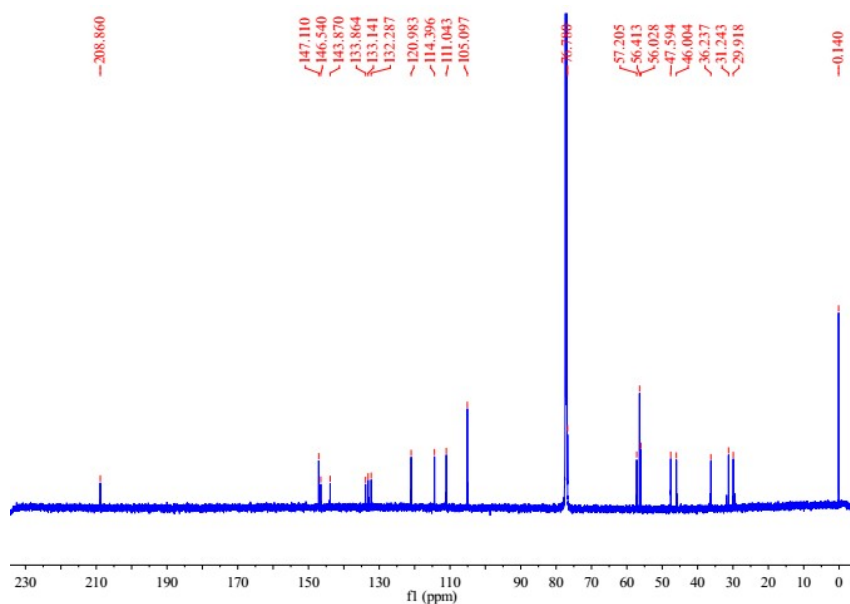

Figure S41. <sup>13</sup>C-NMR spectrum of compound 5

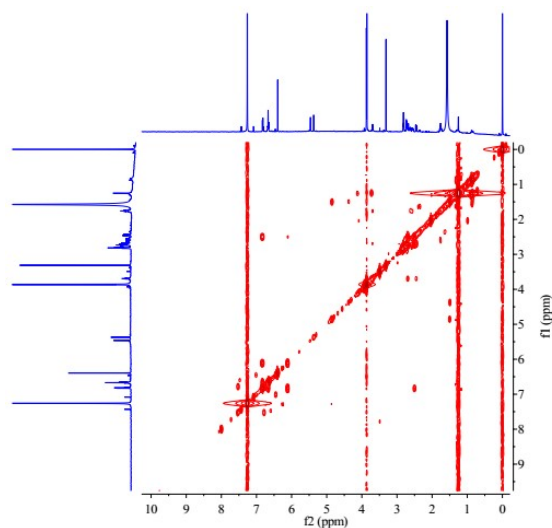

**Figure S42. <sup>1</sup>H-<sup>1</sup>H COSY spectrum of compound 5**

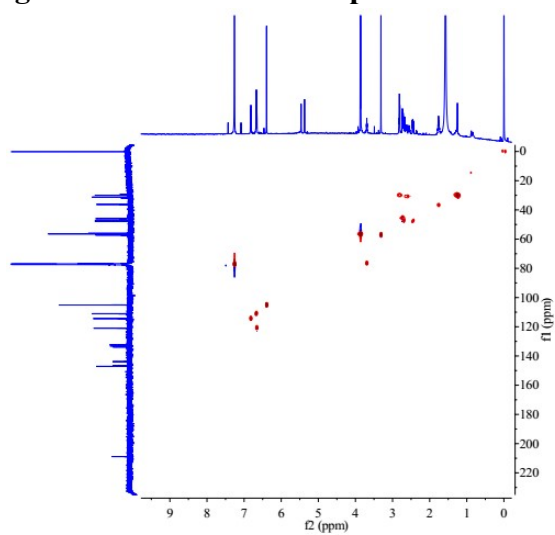

**Figure S43. HSQC spectrum of compound 5**

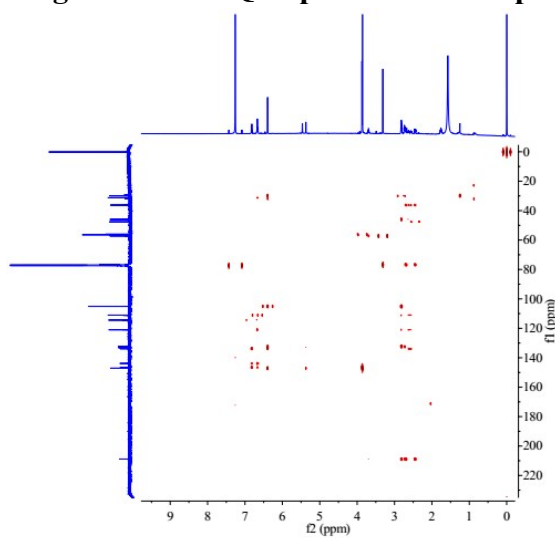

**Figure S44. HMBC spectrum of compound 5**

## Compound 6

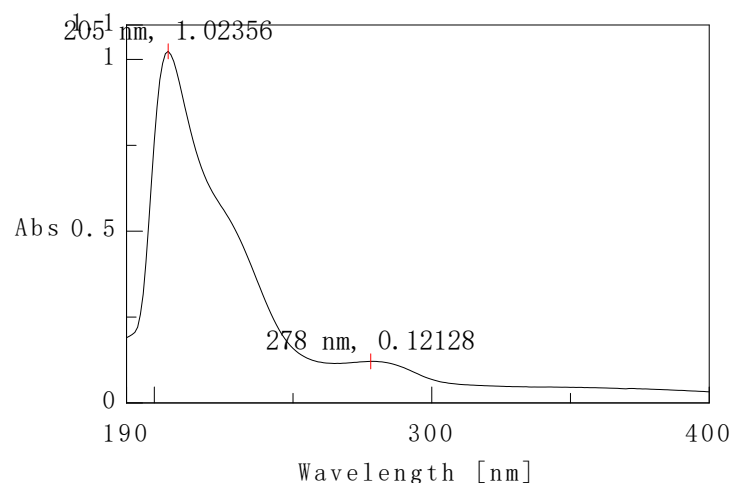

Figure S45. UV spectrum of compound 6

### Elemental Composition Report

Page 1

#### Single Mass Analysis

Tolerance = 5.0 mDa / DBE: min = -1.5, max = 50.0

Element prediction: Off

Number of isotope peaks used for i-FIT = 3

Monoisotopic Mass, Even Electron Ions

86 formula(e) evaluated with 2 results within limits (up to 50 best isotopic matches for each mass)

Elements Used:

C: 0-500 H: 0-1000 O: 0-200

Z02Q7M2

20191028-27 186 (1.503)

1: TOF MS ES+  
1.60e+005

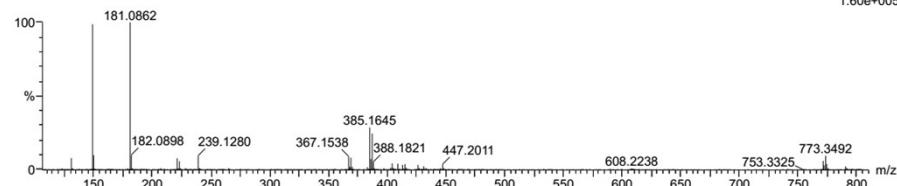

| Mass     | Calc. Mass | mDa  | PPM  | DBE  | i-FIT | Conf (%) | Formula    |
|----------|------------|------|------|------|-------|----------|------------|
| 387.1794 | 387.1808   | -1.4 | -3.6 | 9.5  | 224.0 | 97.71    | C22 H27 O6 |
| 387.1749 | 387.1749   | 4.5  | 11.6 | 18.5 | 227.7 | 2.29     | C29 H23 O  |

Figure S46. HR-ESI-MS spectrum of compound 6

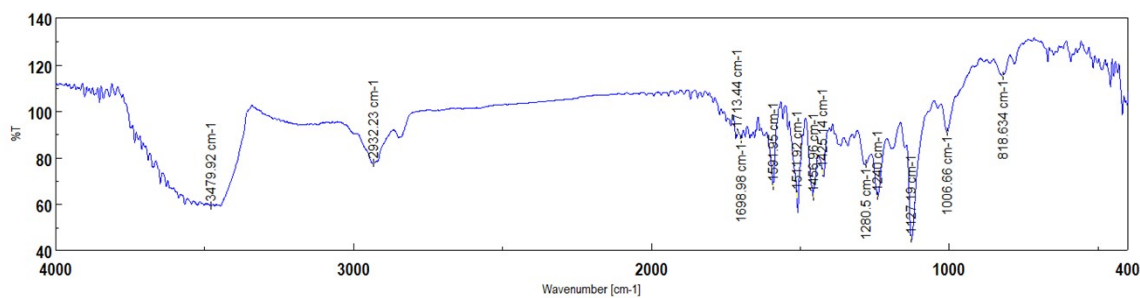

Figure S47. IR spectrum of compound 6

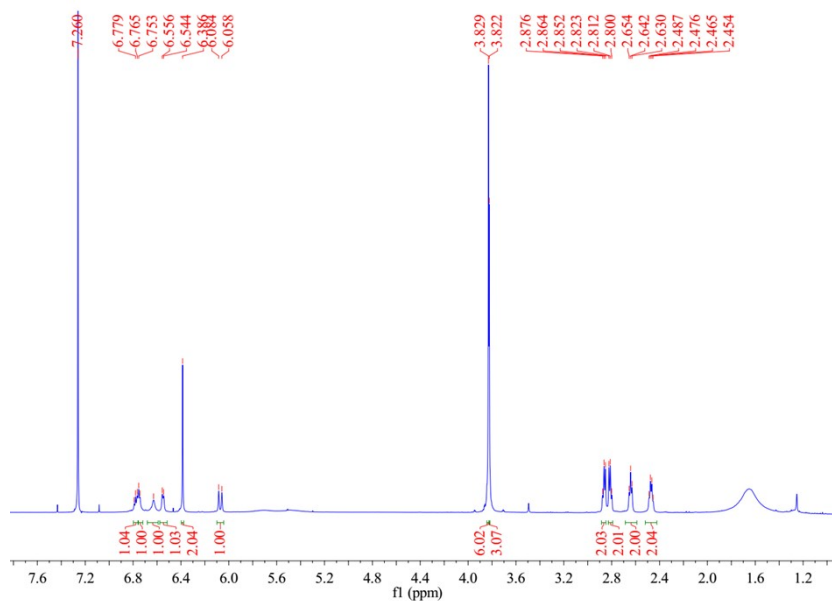

Figure S48.  $^1\text{H-NMR}$  spectrum of compound 6

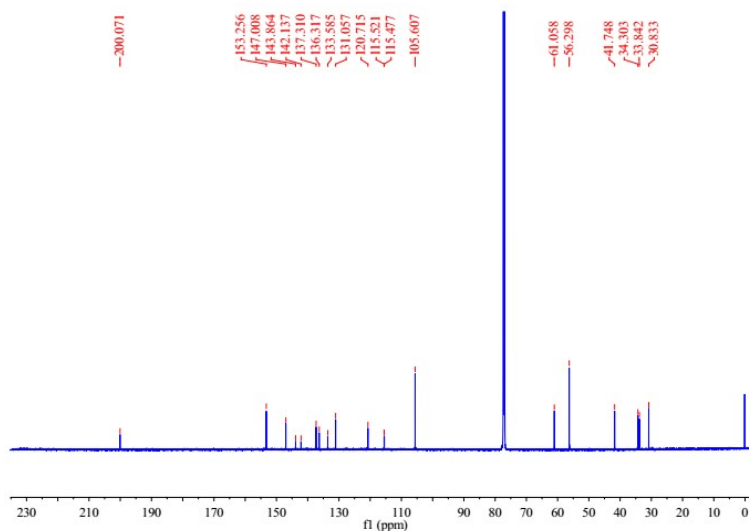

Figure S49.  $^{13}\text{C-NMR}$  spectrum of compound 6

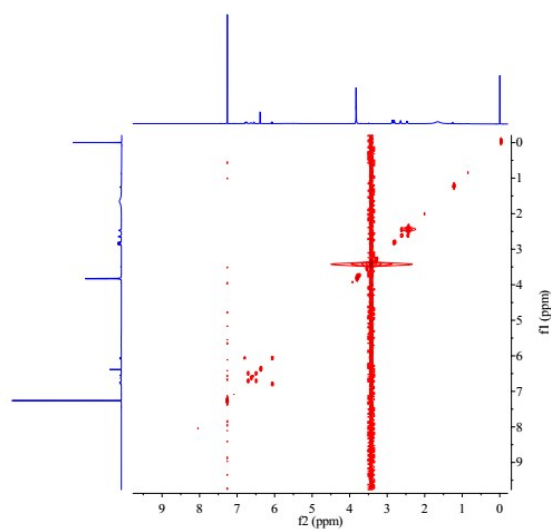

Figure S50.  $^1\text{H-}^1\text{H}$  COSY spectrum of compound 6

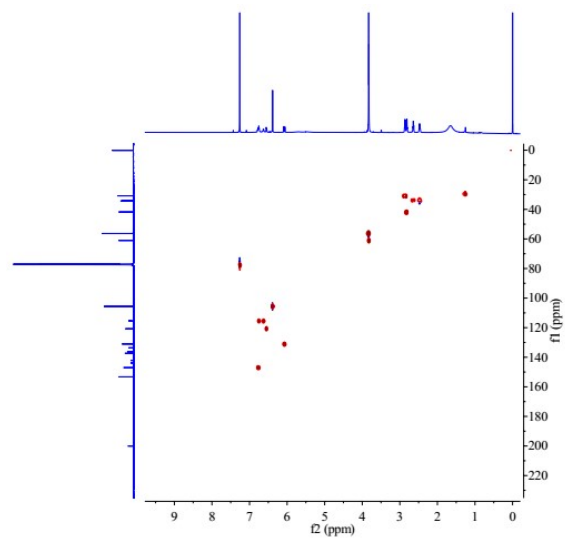

**Figure S51. HSQC spectrum of compound 6**

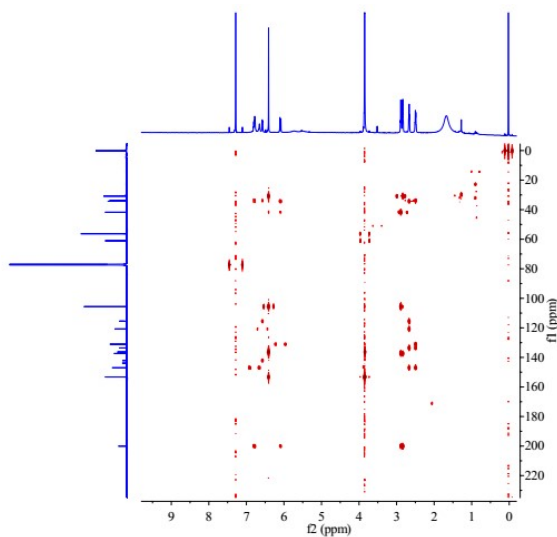

**Figure S52. HMBC spectrum of compound 6  
Compound 7**

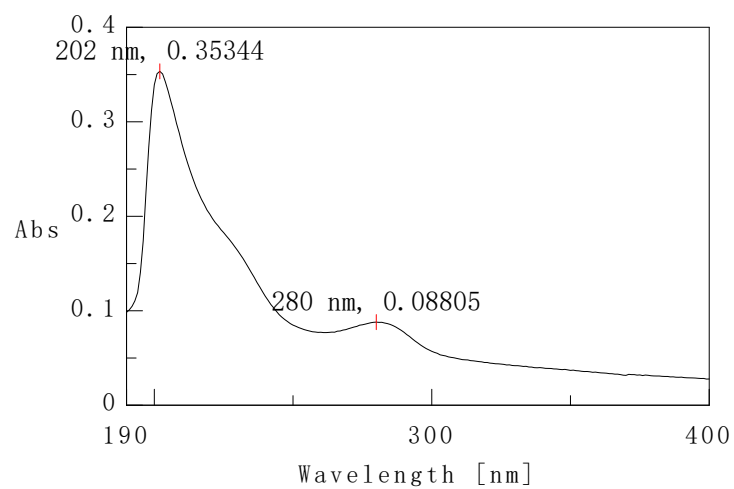

**Figure S53. UV spectrum of compound7**

## Single Mass Analysis

Tolerance = 10.0 PPM / DBE: min = -1.5, max = 50.0

Element prediction: Off

Number of isotope peaks used for i-FIT = 3

Monoisotopic Mass, Even Electron Ions

177 formula(e) evaluated with 3 results within limits (all results (up to 1000) for each mass)

Elements Used:

C: 0-100 H: 0-500 O: 0-50 Na: 0-1

ZO2Q10F

20200610014 164 (1.328)

1: TOF MS ES+  
7.57e+004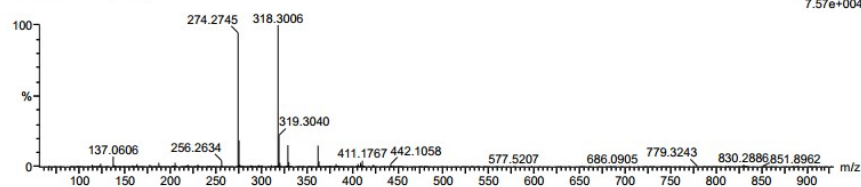

| Mass     | Calc. Mass | mDa  | PPM   | DBE  | i-FIT | Conf (%) | Formula       |
|----------|------------|------|-------|------|-------|----------|---------------|
| 411.1767 | 411.1784   | -1.7 | -4.1  | 8.5  | 89.1  | 58.62    | C22 H28 O6 Na |
|          | 411.1749   | 1.8  | 4.4   | 20.5 | 91.0  | 8.73     | C31 H23 O     |
|          | 411.1808   | -4.1 | -10.0 | 11.5 | 89.7  | 32.66    | C24 H27 O6    |

Figure S54. HR-ESI-MS spectrum of compound 7

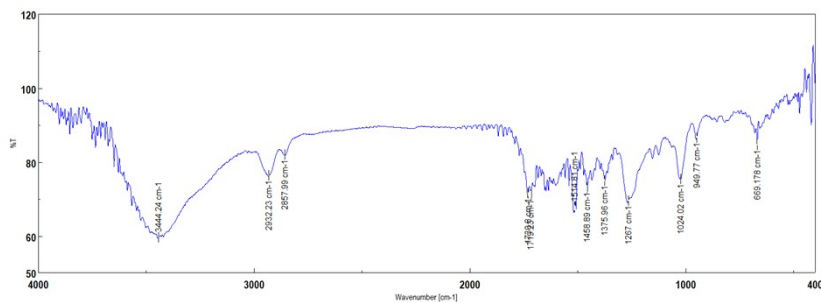

Figure S55. IR spectrum of compound 7

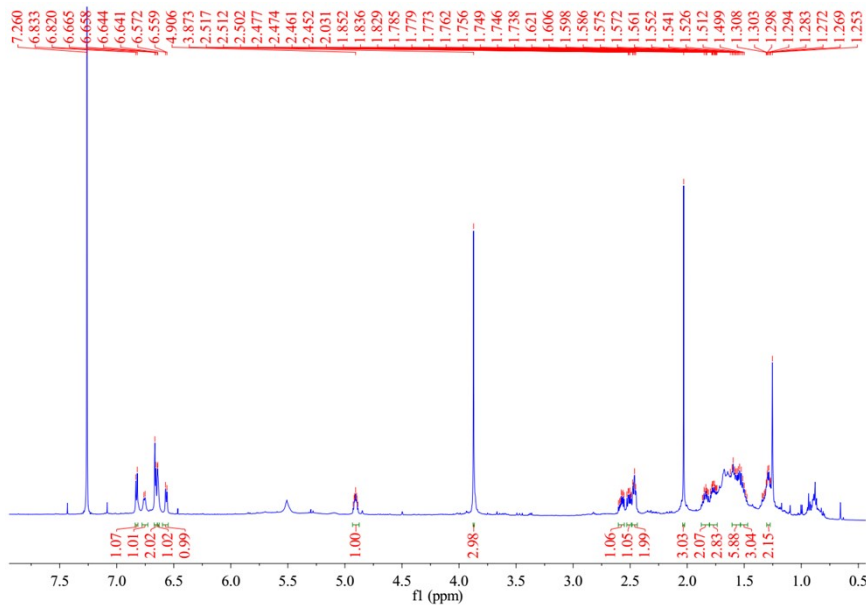Figure S56. <sup>1</sup>H-NMR spectrum of compound 7



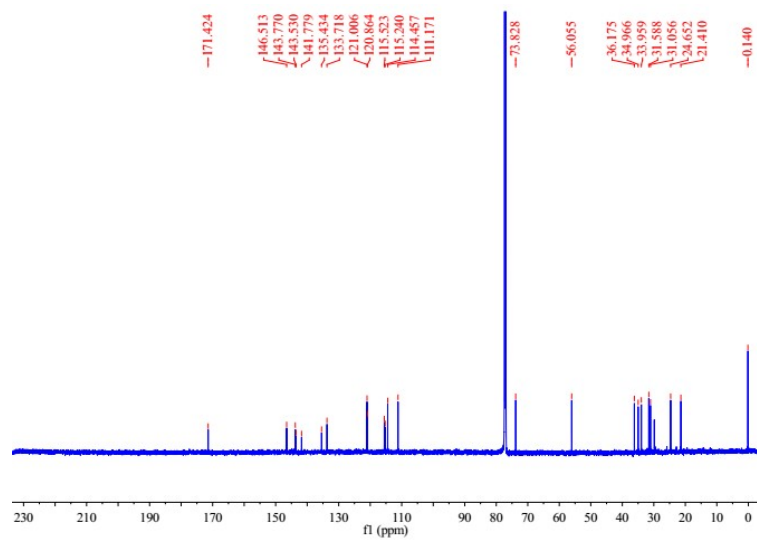

Figure S57. <sup>13</sup>C-NMR spectrum of compound 7

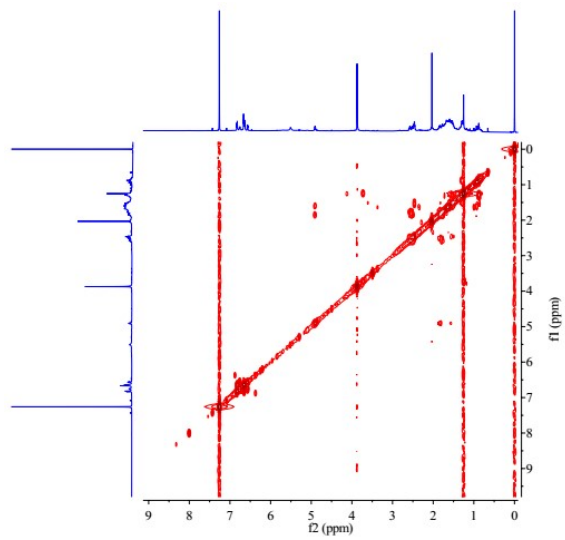

Figure S58. <sup>1</sup>H-<sup>1</sup>H COSY spectrum of compound 7

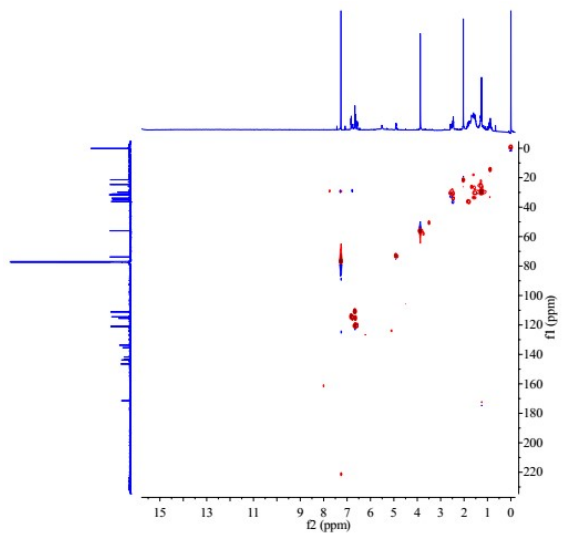

Figure S59. HSQC spectrum of compound 7

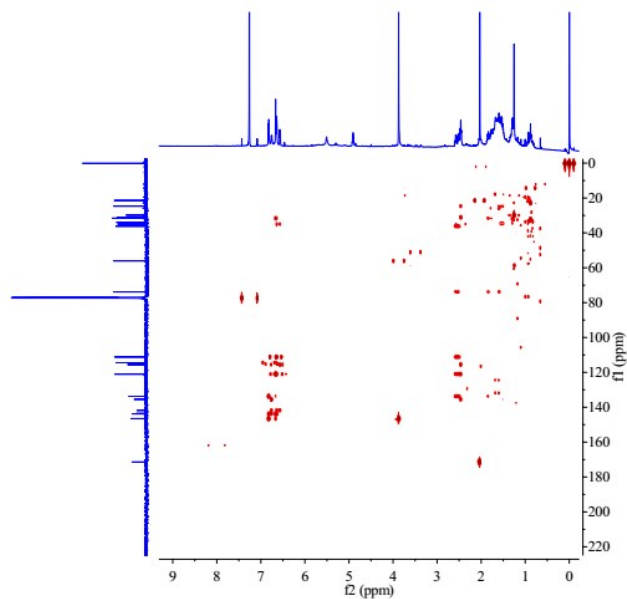

**Figure S60. HMBC spectrum of compound 7  
Compound 8**

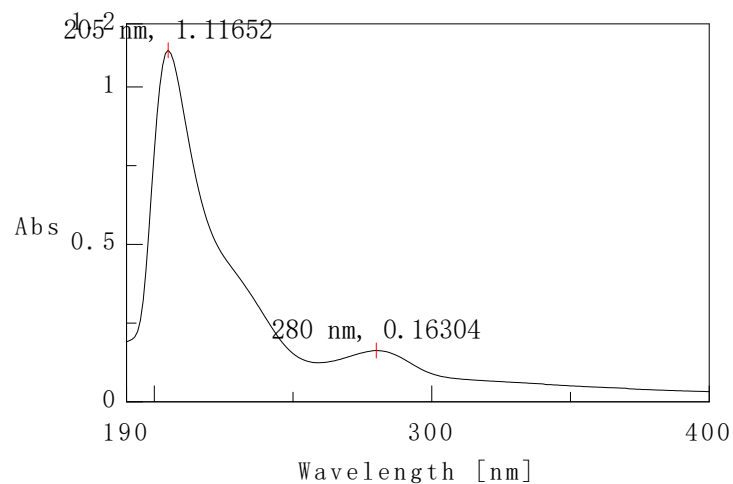

**Figure S61. UV spectrum of compound 8**

**Elemental Composition Report**

Page 1

**Single Mass Analysis**

Tolerance = 10.0 PPM / DBE: min = -1.5, max = 50.0

Element prediction: Off

Number of isotope peaks used for i-FIT = 3

Monoisotopic Mass, Even Electron Ions

190 formula(e) evaluated with 3 results within limits (all results (up to 1000) for each mass)

Elements Used:

C: 0-100 H: 0-500 O: 0-50 Na: 0-1

ZO2R9H2

20200610017 158 (1.283)

1: TOF MS ES+  
1.66e+005

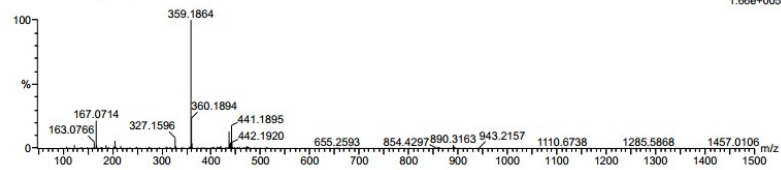

Minimum: -1.5  
Maximum: 5.0 10.0 50.0

| Mass     | Calc. Mass | mDa  | PPM  | DBE   | i-FIT | Conf(%) | Formula       |
|----------|------------|------|------|-------|-------|---------|---------------|
| 441.1895 | 441.1889   | 0.6  | 1.4  | 8.5   | 209.8 | 92.41   | C23 H30 O7 Na |
| 441.1913 | -1.8       | -4.1 | 11.5 | 212.3 | 7.56  |         | C25 H29 O7    |
| 441.1855 | 4.0        | 9.1  | 20.5 | 217.8 | 0.03  |         | C32 H25 O2    |

**Figure S62. HR-ESI-MS spectrum of compound 8**

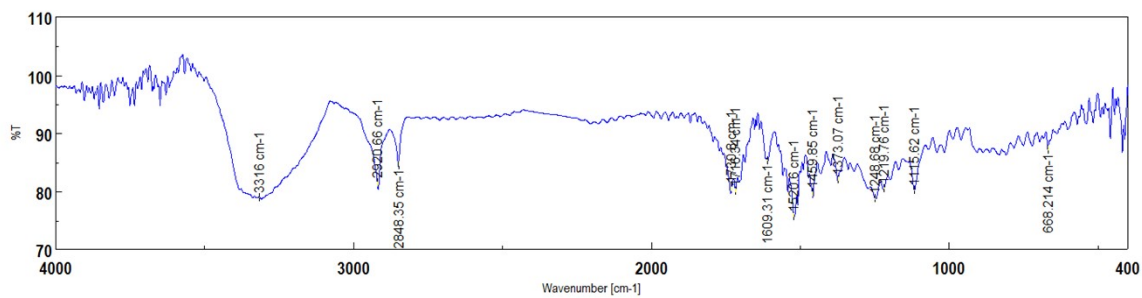

Figure S63. IR spectrum of compound 8

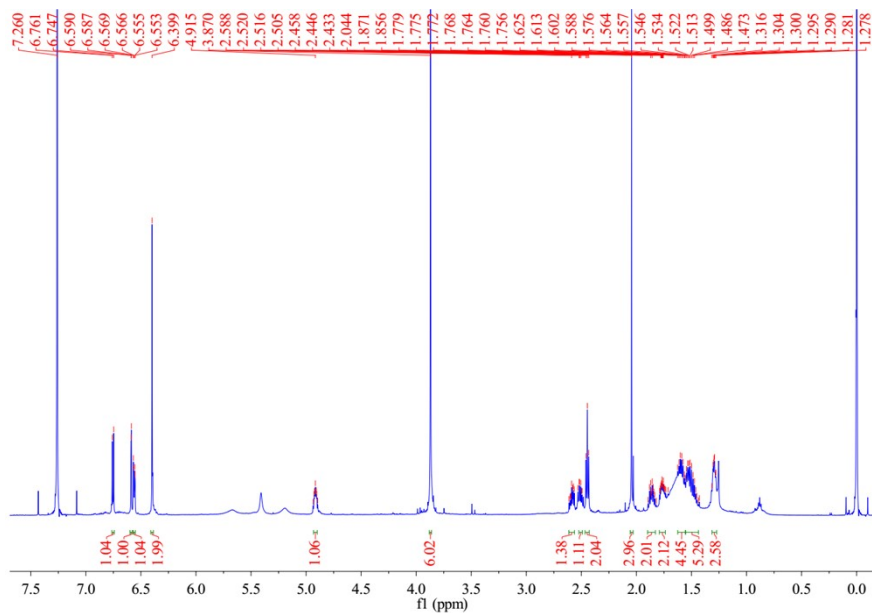

Figure S64. <sup>1</sup>H-NMR spectrum of compound 8

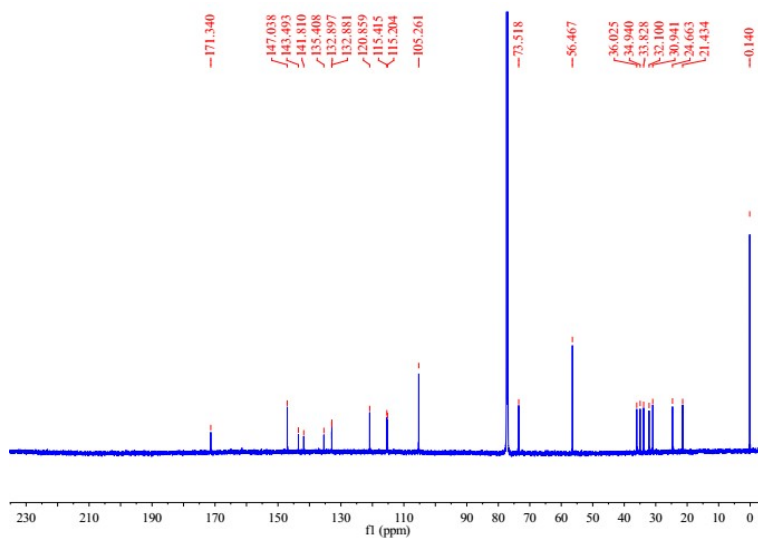

Figure S65. <sup>13</sup>C-NMR spectrum of compound 8

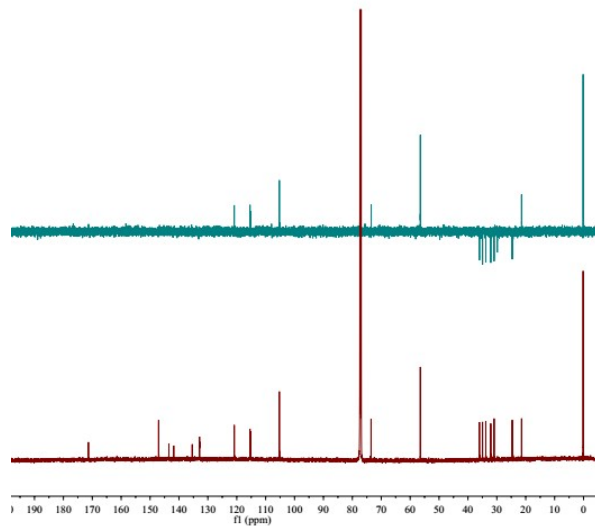

**Figure S66.**  $^{13}\text{C}$ -NMR and DEPT 135 spectra of compound 8

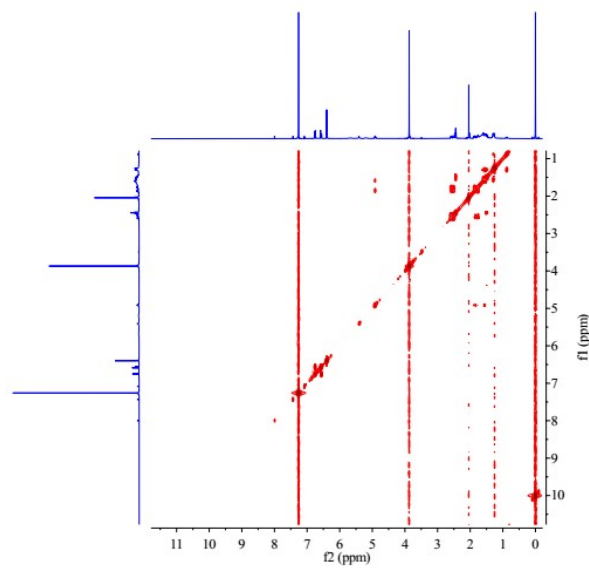

**Figure S67.**  $^1\text{H}$ - $^1\text{H}$  COSY spectrum of compound 8

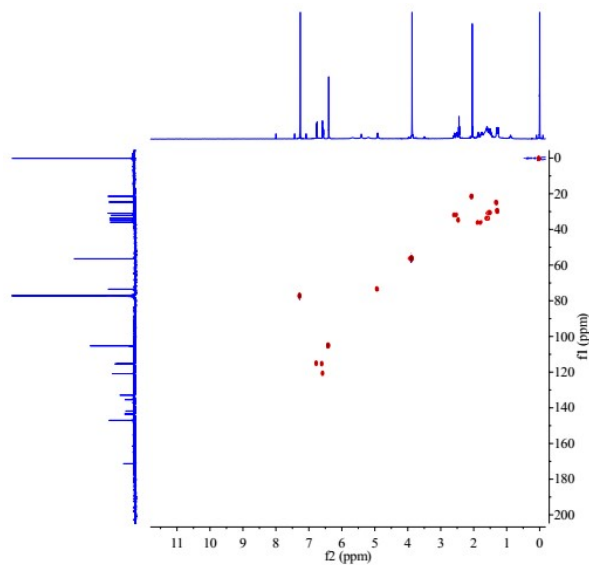

**Figure S68.** HSQC spectrum of compound 8

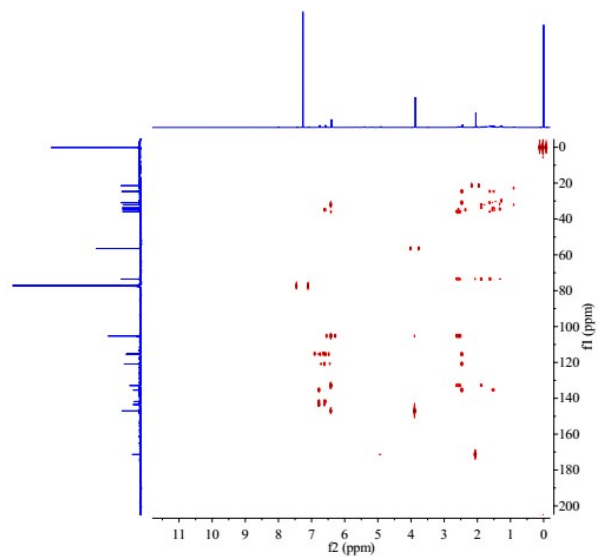

**Figure S69. HMBC spectrum of compound 8**

#### 4. ECD calculation

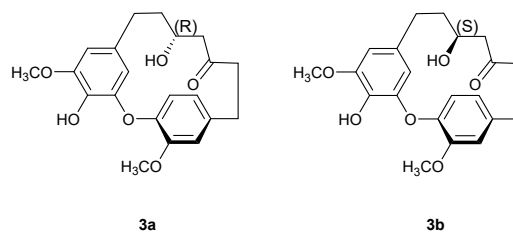

Figure S70. The structures of compounds 3a and 3b.

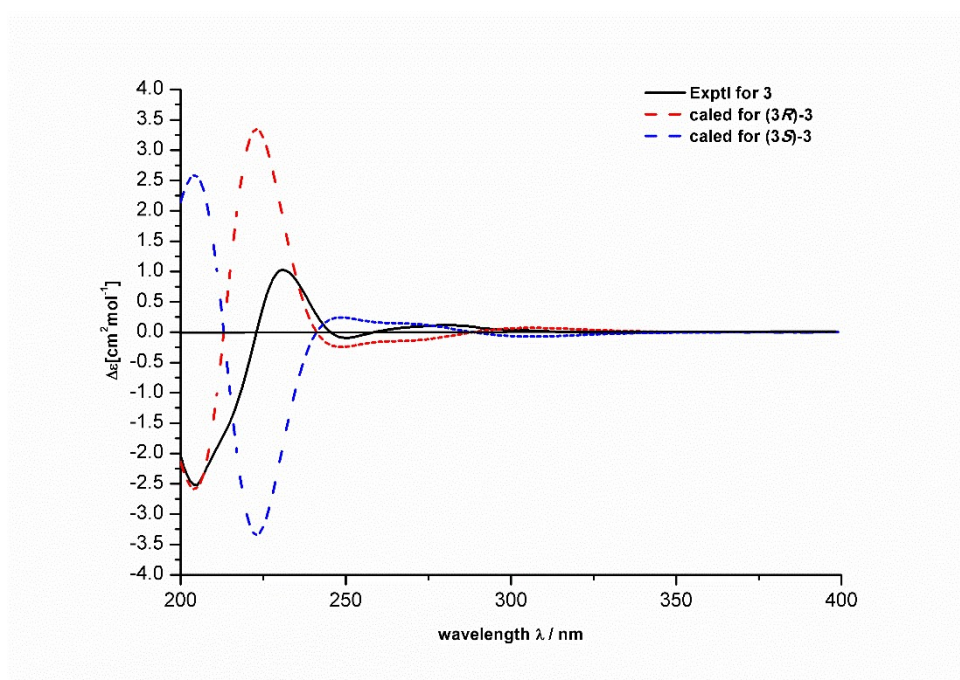

Figure S71. Experimental and calculated CD spectra of compound 3.

## 5. The western blotting assay results of A549 cell line

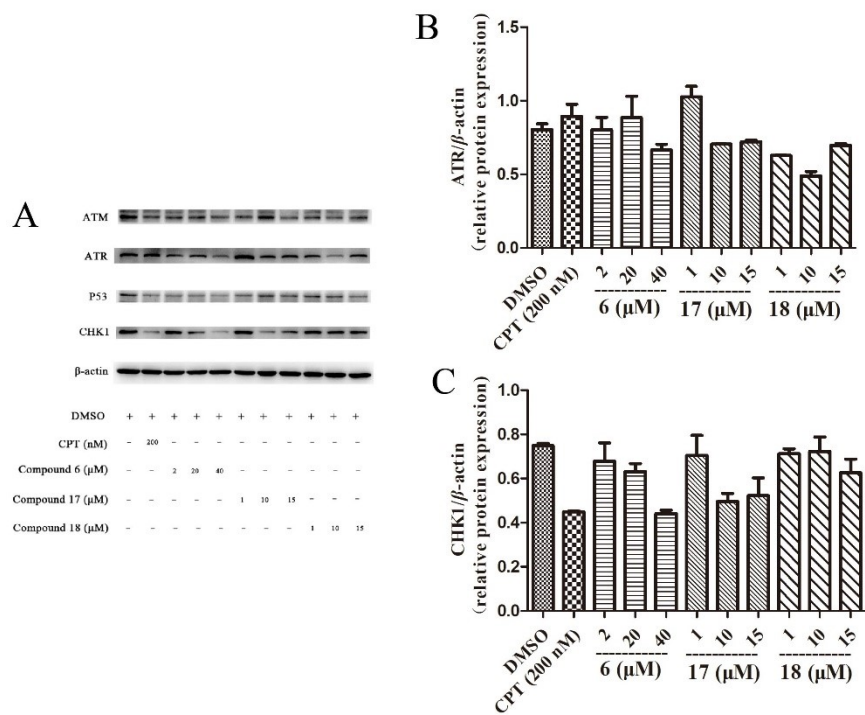

**Figure S72.** Effects of compounds **6**, **17**, and **18** on the protein expression of ATM, ATR, P53, and CHK1 in A549 cell line. A549 cells were pretreated with different concentrations of compounds **6**, **17**, and **18** for 24 h. The cells were lysed with RIPA buffer and the protein levels for total ATM, ATR, P53, and CHK1 were measured by using immunoblot analysis.  $\beta$ -Actin was used as a loading control. CPT was used as a positive control. And all of the experiments have been repeated three times independently.
