# Supplementary material for: Diarylheptanoid analogues from the rhizomes ofZingiber officinaleand their anti-tumour activity
Source: Royal Society of Chemistry journal article supplement (doi:10.1039/d1ra03592d), 2021-01-01
Supplement: d1ra03592d2.pdf [file d1ra03592d2.pdf]

ATR:

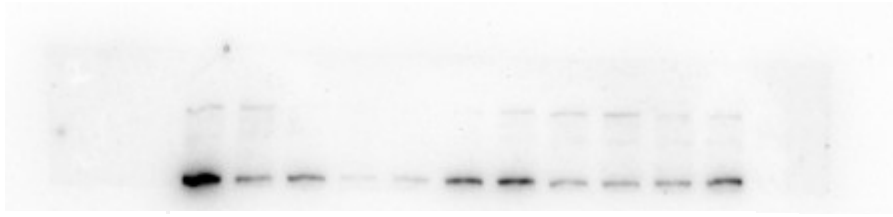

|                     |   |   |     |   |    |    |   |    |    |   |   |    |
|---------------------|---|---|-----|---|----|----|---|----|----|---|---|----|
| <b>Marker</b>       | + | - | -   | - | -  | -  | - | -  | -  | - | - | +  |
| <b>DMSO</b>         | - | + | +   | + | +  | +  | + | +  | +  | + | + | -  |
| <b>CPT (nM)</b>     | - | - | 200 | - | -  | -  | - | -  | -  | - | - | -  |
| <b>Comp 6 (μM)</b>  | - | - | -   | 1 | 15 | 20 | - | -  | -  | - | - | -  |
| <b>Comp 17 (μM)</b> | - | - | -   | - | -  | -  | 1 | 10 | 15 | - | - | -  |
| <b>Comp 18 (μM)</b> | - | - | -   | - | -  | -  | - | -  | -  | 1 | 5 | 10 |

P53:

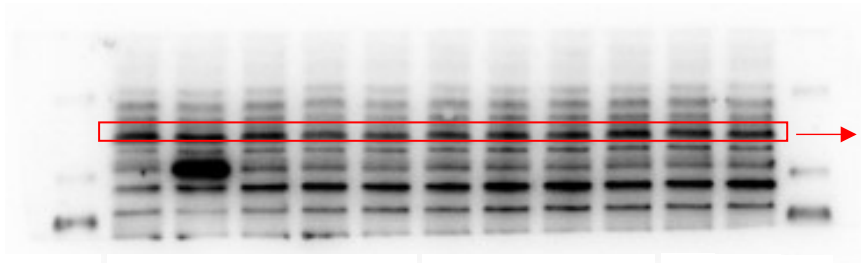

This protein band is P53.

|                     |   |   |     |   |    |    |   |    |    |   |   |    |
|---------------------|---|---|-----|---|----|----|---|----|----|---|---|----|
| <b>Marker</b>       | + | - | -   | - | -  | -  | - | -  | -  | - | - | +  |
| <b>DMSO</b>         | - | + | +   | + | +  | +  | + | +  | +  | + | + | -  |
| <b>CPT (nM)</b>     | - | - | 200 | - | -  | -  | - | -  | -  | - | - | -  |
| <b>Comp 6 (μM)</b>  | - | - | -   | 1 | 15 | 20 | - | -  | -  | - | - | -  |
| <b>Comp 17 (μM)</b> | - | - | -   | - | -  | -  | 1 | 10 | 15 | - | - | -  |
| <b>Comp 18 (μM)</b> | - | - | -   | - | -  | -  | - | -  | -  | 1 | 5 | 10 |

CHK1:

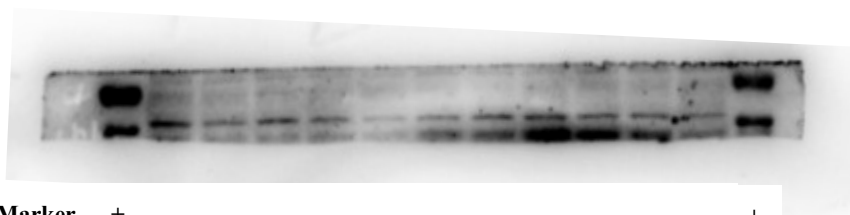

|                     |   |   |     |   |    |    |   |    |    |   |   |    |
|---------------------|---|---|-----|---|----|----|---|----|----|---|---|----|
| <b>Marker</b>       | + | - | -   | - | -  | -  | - | -  | -  | - | - | +  |
| <b>DMSO</b>         | - | + | +   | + | +  | +  | + | +  | +  | + | + | -  |
| <b>CPT (nM)</b>     | - | - | 200 | - | -  | -  | - | -  | -  | - | - | -  |
| <b>Comp 6 (μM)</b>  | - | - | -   | 1 | 15 | 20 | - | -  | -  | - | - | -  |
| <b>Comp 17 (μM)</b> | - | - | -   | - | -  | -  | 1 | 10 | 15 | - | - | -  |
| <b>Comp 18 (μM)</b> | - | - | -   | - | -  | -  | - | -  | -  | 1 | 5 | 10 |

$\beta$ -actin:

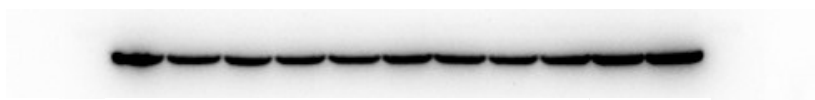

|                    |   |   |     |   |    |    |   |    |    |   |   |    |
|--------------------|---|---|-----|---|----|----|---|----|----|---|---|----|
| Marker             | + | - | -   | - | -  | -  | - | -  | -  | - | - | +  |
| DMSO               | - | + | +   | + | +  | +  | + | +  | +  | + | + | -  |
| CPT (nM)           | - | - | 200 | - | -  | -  | - | -  | -  | - | - | -  |
| Comp 6 ( $\mu$ M)  | - | - | -   | 1 | 15 | 20 | - | -  | -  | - | - | -  |
| Comp 17 ( $\mu$ M) | - | - | -   | - | -  | -  | 1 | 10 | 15 | - | - | -  |
| Comp 18 ( $\mu$ M) | - | - | -   | - | -  | -  | - | -  | -  | 1 | 5 | 10 |

**The second group:**

ATM:

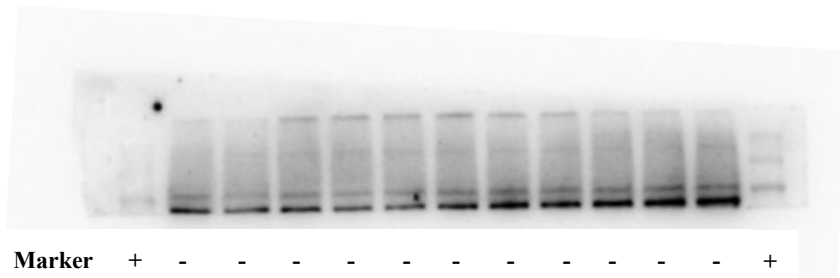

|                    |   |   |     |   |    |    |   |    |    |   |   |    |
|--------------------|---|---|-----|---|----|----|---|----|----|---|---|----|
| Marker             | + | - | -   | - | -  | -  | - | -  | -  | - | - | +  |
| DMSO               | - | + | +   | + | +  | +  | + | +  | +  | + | + | -  |
| CPT (nM)           | - | - | 200 | - | -  | -  | - | -  | -  | - | - | -  |
| Comp 6 ( $\mu$ M)  | - | - | -   | 1 | 15 | 20 | - | -  | -  | - | - | -  |
| Comp 17 ( $\mu$ M) | - | - | -   | - | -  | -  | 1 | 10 | 15 | - | - | -  |
| Comp 18 ( $\mu$ M) | - | - | -   | - | -  | -  | - | -  | -  | 1 | 5 | 10 |

ATR:

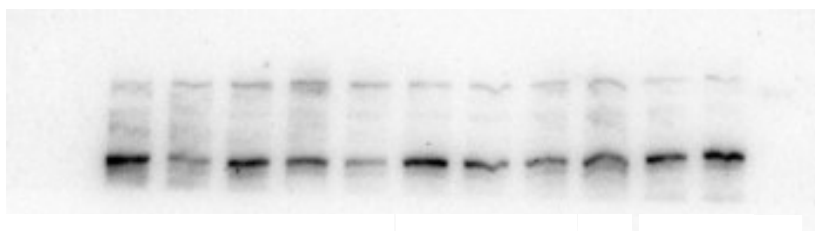

|                    |   |   |     |   |    |    |   |    |    |   |   |    |
|--------------------|---|---|-----|---|----|----|---|----|----|---|---|----|
| Marker             | + | - | -   | - | -  | -  | - | -  | -  | - | - | +  |
| DMSO               | - | + | +   | + | +  | +  | + | +  | +  | + | + | -  |
| CPT (nM)           | - | - | 200 | - | -  | -  | - | -  | -  | - | - | -  |
| Comp 6 ( $\mu$ M)  | - | - | -   | 1 | 15 | 20 | - | -  | -  | - | - | -  |
| Comp 17 ( $\mu$ M) | - | - | -   | - | -  | -  | 1 | 10 | 15 | - | - | -  |
| Comp 18 ( $\mu$ M) | - | - | -   | - | -  | -  | - | -  | -  | 1 | 5 | 10 |

P53:

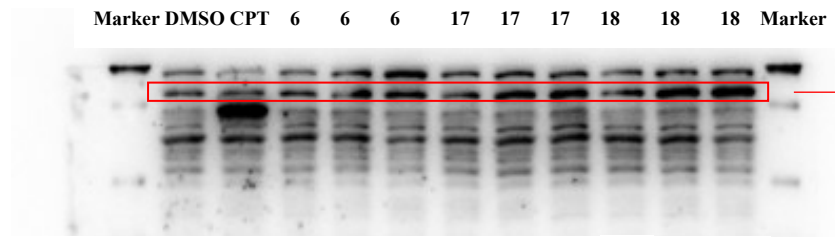

→ This protein band is P53.

|              |   |   |     |   |    |    |   |    |    |   |   |    |   |
|--------------|---|---|-----|---|----|----|---|----|----|---|---|----|---|
| Marker       | + | - | -   | - | -  | -  | - | -  | -  | - | - | -  | + |
| DMSO         | - | + | +   | + | +  | +  | + | +  | +  | + | + | +  | - |
| CPT (nM)     | - | - | 200 | - | -  | -  | - | -  | -  | - | - | -  | - |
| Comp 6 (μM)  | - | - | -   | 1 | 15 | 20 | - | -  | -  | - | - | -  | - |
| Comp 17 (μM) | - | - | -   | - | -  | -  | 1 | 10 | 15 | - | - | -  | - |
| Comp 18 (μM) | - | - | -   | - | -  | -  | - | -  | -  | 1 | 5 | 10 | - |

CHK1:

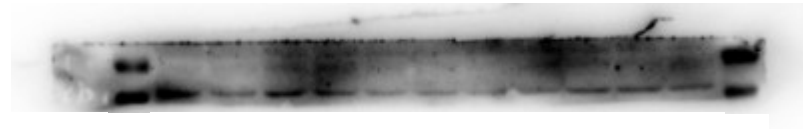

|              |   |   |     |   |    |    |   |    |    |   |   |    |   |
|--------------|---|---|-----|---|----|----|---|----|----|---|---|----|---|
| Marker       | + | - | -   | - | -  | -  | - | -  | -  | - | - | -  | + |
| DMSO         | - | + | +   | + | +  | +  | + | +  | +  | + | + | +  | - |
| CPT (nM)     | - | - | 200 | - | -  | -  | - | -  | -  | - | - | -  | - |
| Comp 6 (μM)  | - | - | -   | 1 | 15 | 20 | - | -  | -  | - | - | -  | - |
| Comp 17 (μM) | - | - | -   | - | -  | -  | 1 | 10 | 15 | - | - | -  | - |
| Comp 18 (μM) | - | - | -   | - | -  | -  | - | -  | -  | 1 | 5 | 10 | - |

β-actin:

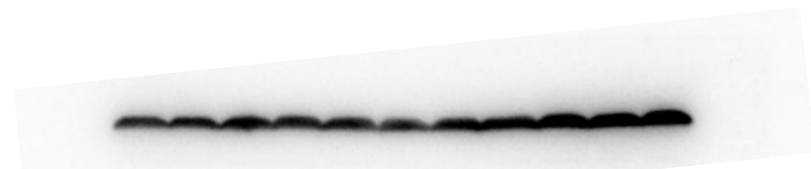

|              |   |   |     |   |    |    |   |    |    |   |   |    |   |
|--------------|---|---|-----|---|----|----|---|----|----|---|---|----|---|
| Marker       | + | - | -   | - | -  | -  | - | -  | -  | - | - | -  | + |
| DMSO         | - | + | +   | + | +  | +  | + | +  | +  | + | + | +  | - |
| CPT (nM)     | - | - | 200 | - | -  | -  | - | -  | -  | - | - | -  | - |
| Comp 6 (μM)  | - | - | -   | 1 | 15 | 20 | - | -  | -  | - | - | -  | - |
| Comp 17 (μM) | - | - | -   | - | -  | -  | 1 | 10 | 15 | - | - | -  | - |
| Comp 18 (μM) | - | - | -   | - | -  | -  | - | -  | -  | 1 | 5 | 10 | - |

**The third group:**

ATM:

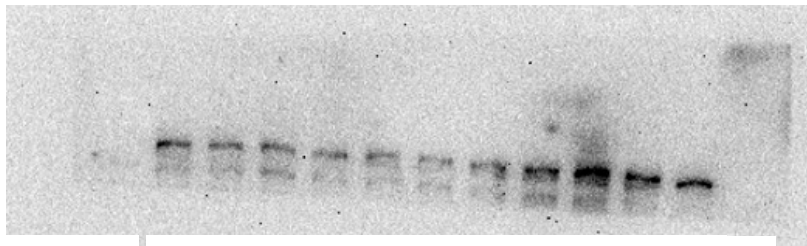

|              |   |   |     |   |    |    |   |    |    |   |   |    |
|--------------|---|---|-----|---|----|----|---|----|----|---|---|----|
| Marker       | + | - | -   | - | -  | -  | - | -  | -  | - | - | +  |
| DMSO         | - | + | +   | + | +  | +  | + | +  | +  | + | + | -  |
| CPT (nM)     | - | - | 200 | - | -  | -  | - | -  | -  | - | - | -  |
| Comp 6 (μM)  | - | - | -   | 1 | 15 | 20 | - | -  | -  | - | - | -  |
| Comp 17 (μM) | - | - | -   | - | -  | -  | 1 | 10 | 15 | - | - | -  |
| Comp 18 (μM) | - | - | -   | - | -  | -  | - | -  | -  | 1 | 5 | 10 |

ATR:

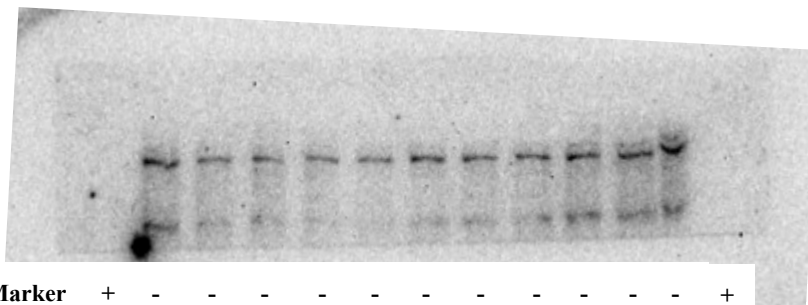

|              |   |   |     |   |    |    |   |    |    |   |   |    |
|--------------|---|---|-----|---|----|----|---|----|----|---|---|----|
| Marker       | + | - | -   | - | -  | -  | - | -  | -  | - | - | +  |
| DMSO         | - | + | +   | + | +  | +  | + | +  | +  | + | + | -  |
| CPT (nM)     | - | - | 200 | - | -  | -  | - | -  | -  | - | - | -  |
| Comp 6 (μM)  | - | - | -   | 1 | 15 | 20 | - | -  | -  | - | - | -  |
| Comp 17 (μM) | - | - | -   | - | -  | -  | 1 | 10 | 15 | - | - | -  |
| Comp 18 (μM) | - | - | -   | - | -  | -  | - | -  | -  | 1 | 5 | 10 |

P53:

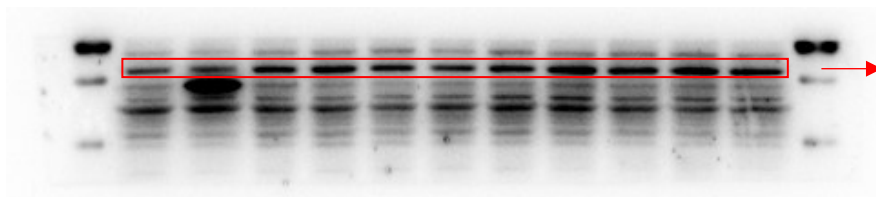

This protein band is P53.

|              |   |   |     |   |    |    |   |    |    |   |   |    |
|--------------|---|---|-----|---|----|----|---|----|----|---|---|----|
| Marker       | + | - | -   | - | -  | -  | - | -  | -  | - | - | +  |
| DMSO         | - | + | +   | + | +  | +  | + | +  | +  | + | + | -  |
| CPT (nM)     | - | - | 200 | - | -  | -  | - | -  | -  | - | - | -  |
| Comp 6 (μM)  | - | - | -   | 1 | 15 | 20 | - | -  | -  | - | - | -  |
| Comp 17 (μM) | - | - | -   | - | -  | -  | 1 | 10 | 15 | - | - | -  |
| Comp 18 (μM) | - | - | -   | - | -  | -  | - | -  | -  | 1 | 5 | 10 |

CHK1:

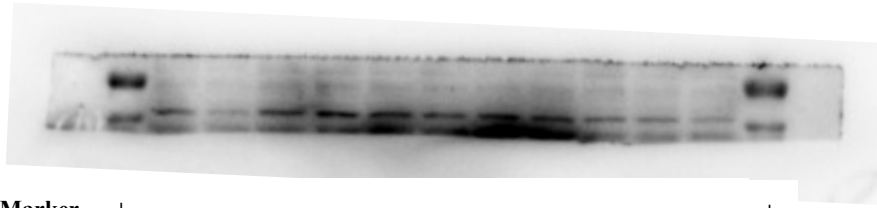

|              |   |   |     |   |    |    |   |    |    |   |   |    |
|--------------|---|---|-----|---|----|----|---|----|----|---|---|----|
| Marker       | + | - | -   | - | -  | -  | - | -  | -  | - | - | +  |
| DMSO         | - | + | +   | + | +  | +  | + | +  | +  | + | + | -  |
| CPT (nM)     | - | - | 200 | - | -  | -  | - | -  | -  | - | - | -  |
| Comp 6 (μM)  | - | - | -   | 1 | 15 | 20 | - | -  | -  | - | - | -  |
| Comp 17 (μM) | - | - | -   | - | -  | -  | 1 | 10 | 15 | - | - | -  |
| Comp 18 (μM) | - | - | -   | - | -  | -  | - | -  | -  | 1 | 5 | 10 |

β-actin:

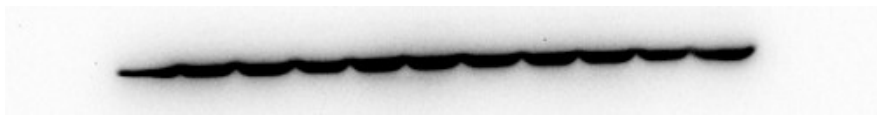

|              |   |   |     |   |    |    |   |    |    |   |   |    |
|--------------|---|---|-----|---|----|----|---|----|----|---|---|----|
| Marker       | + | - | -   | - | -  | -  | - | -  | -  | - | - | +  |
| DMSO         | - | + | +   | + | +  | +  | + | +  | +  | + | + | -  |
| CPT (nM)     | - | - | 200 | - | -  | -  | - | -  | -  | - | - | -  |
| Comp 6 (μM)  | - | - | -   | 1 | 15 | 20 | - | -  | -  | - | - | -  |
| Comp 17 (μM) | - | - | -   | - | -  | -  | 1 | 10 | 15 | - | - | -  |
| Comp 18 (μM) | - | - | -   | - | -  | -  | - | -  | -  | 1 | 5 | 10 |

## 2. A549 Western blots data in the supple:

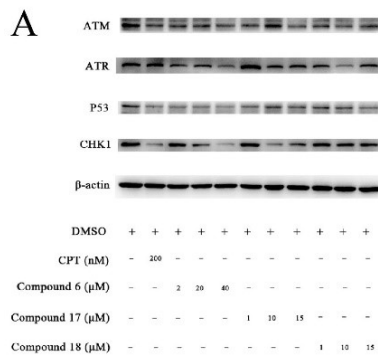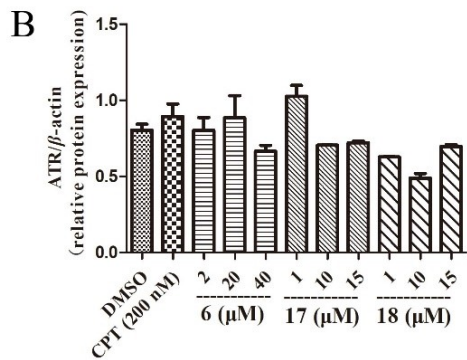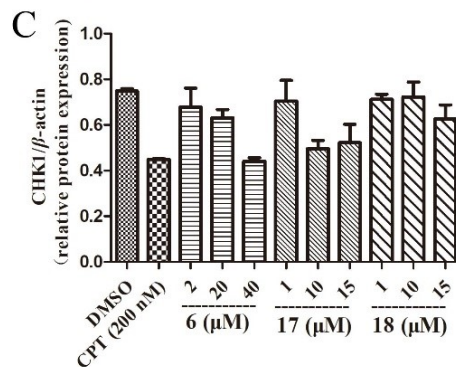

The corresponding raw data as following:

The first group:

ATM:

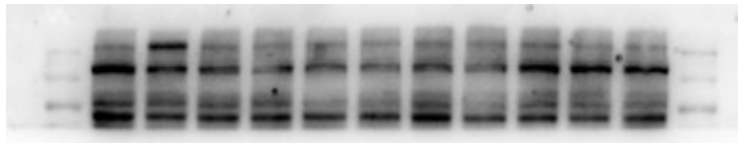

|              |   |   |     |   |    |    |   |    |    |   |   |    |
|--------------|---|---|-----|---|----|----|---|----|----|---|---|----|
| Marker       | + | - | -   | - | -  | -  | - | -  | -  | - | - | +  |
| DMSO         | - | + | +   | + | +  | +  | + | +  | +  | + | + | -  |
| CPT (nM)     | - | - | 200 | - | -  | -  | - | -  | -  | - | - | -  |
| Comp 6 (μM)  | - | - | -   | 1 | 15 | 20 | - | -  | -  | - | - | -  |
| Comp 17 (μM) | - | - | -   | - | -  | -  | 1 | 10 | 15 | - | - | -  |
| Comp 18 (μM) | - | - | -   | - | -  | -  | - | -  | -  | 1 | 5 | 10 |

ATR:

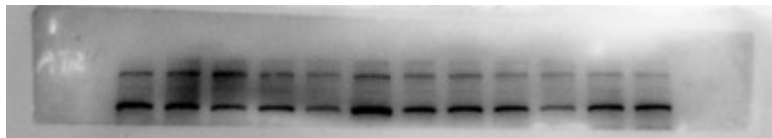

The molecular weight of ATR is similar to that of ATM. The protein was run separately under the same conditions.

|              |   |   |     |   |    |    |   |    |    |   |   |    |
|--------------|---|---|-----|---|----|----|---|----|----|---|---|----|
| Marker       | + | - | -   | - | -  | -  | - | -  | -  | - | - | +  |
| DMSO         | - | + | +   | + | +  | +  | + | +  | +  | + | + | -  |
| CPT (nM)     | - | - | 200 | - | -  | -  | - | -  | -  | - | - | -  |
| Comp 6 (μM)  | - | - | -   | 1 | 15 | 20 | - | -  | -  | - | - | -  |
| Comp 17 (μM) | - | - | -   | - | -  | -  | 1 | 10 | 15 | - | - | -  |
| Comp 18 (μM) | - | - | -   | - | -  | -  | - | -  | -  | 1 | 5 | 10 |

P53:

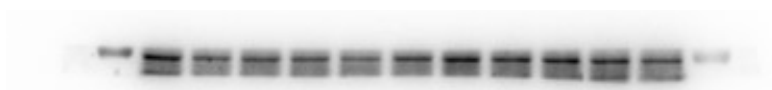

|              |   |   |     |   |    |    |   |    |    |   |   |    |
|--------------|---|---|-----|---|----|----|---|----|----|---|---|----|
| Marker       | + | - | -   | - | -  | -  | - | -  | -  | - | - | +  |
| DMSO         | - | + | +   | + | +  | +  | + | +  | +  | + | + | -  |
| CPT (nM)     | - | - | 200 | - | -  | -  | - | -  | -  | - | - | -  |
| Comp 6 (μM)  | - | - | -   | 1 | 15 | 20 | - | -  | -  | - | - | -  |
| Comp 17 (μM) | - | - | -   | - | -  | -  | 1 | 10 | 15 | - | - | -  |
| Comp 18 (μM) | - | - | -   | - | -  | -  | - | -  | -  | 1 | 5 | 10 |

CHK1:

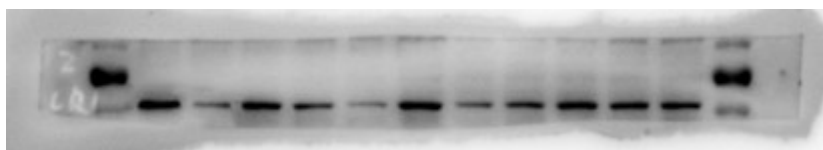

|              |   |   |     |   |    |    |   |    |    |   |   |    |
|--------------|---|---|-----|---|----|----|---|----|----|---|---|----|
| Marker       | + | - | -   | - | -  | -  | - | -  | -  | - | - | +  |
| DMSO         | - | + | +   | + | +  | +  | + | +  | +  | + | + | -  |
| CPT (nM)     | - | - | 200 | - | -  | -  | - | -  | -  | - | - | -  |
| Comp 6 (μM)  | - | - | -   | 1 | 15 | 20 | - | -  | -  | - | - | -  |
| Comp 17 (μM) | - | - | -   | - | -  | -  | 1 | 10 | 15 | - | - | -  |
| Comp 18 (μM) | - | - | -   | - | -  | -  | - | -  | -  | 1 | 5 | 10 |

β-actin:

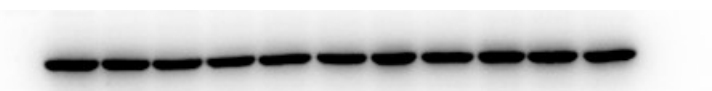

|              |   |   |     |   |    |    |   |    |    |   |   |    |
|--------------|---|---|-----|---|----|----|---|----|----|---|---|----|
| Marker       | + | - | -   | - | -  | -  | - | -  | -  | - | - | +  |
| DMSO         | - | + | +   | + | +  | +  | + | +  | +  | + | + | -  |
| CPT (nM)     | - | - | 200 | - | -  | -  | - | -  | -  | - | - | -  |
| Comp 6 (μM)  | - | - | -   | 1 | 15 | 20 | - | -  | -  | - | - | -  |
| Comp 17 (μM) | - | - | -   | - | -  | -  | 1 | 10 | 15 | - | - | -  |
| Comp 18 (μM) | - | - | -   | - | -  | -  | - | -  | -  | 1 | 5 | 10 |

**The second group:**

ATM:

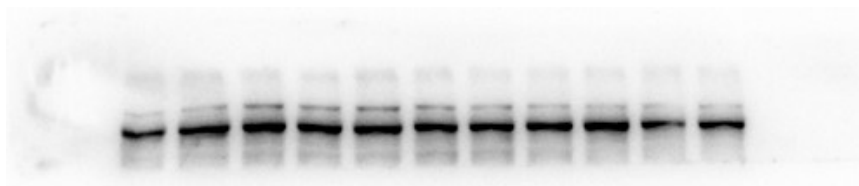

|              |   |   |     |   |    |    |   |    |    |   |   |    |
|--------------|---|---|-----|---|----|----|---|----|----|---|---|----|
| Marker       | + | - | -   | - | -  | -  | - | -  | -  | - | - | +  |
| DMSO         | - | + | +   | + | +  | +  | + | +  | +  | + | + | -  |
| CPT (nM)     | - | - | 200 | - | -  | -  | - | -  | -  | - | - | -  |
| Comp 6 (μM)  | - | - | -   | 1 | 15 | 20 | - | -  | -  | - | - | -  |
| Comp 17 (μM) | - | - | -   | - | -  | -  | 1 | 10 | 15 | - | - | -  |
| Comp 18 (μM) | - | - | -   | - | -  | -  | - | -  | -  | 1 | 5 | 10 |



ATR:

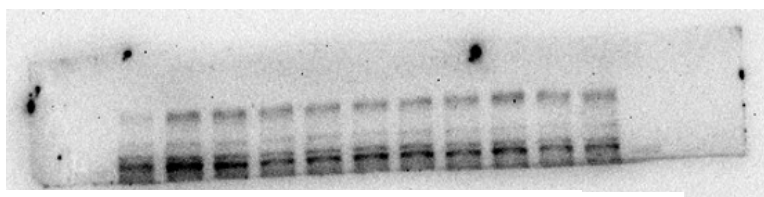

|              |   |   |     |   |    |    |   |    |    |   |   |    |   |
|--------------|---|---|-----|---|----|----|---|----|----|---|---|----|---|
| Marker       | + | - | -   | - | -  | -  | - | -  | -  | - | - | -  | + |
| DMSO         | - | + | +   | + | +  | +  | + | +  | +  | + | + | +  | - |
| CPT (nM)     | - | - | 200 | - | -  | -  | - | -  | -  | - | - | -  | - |
| Comp 6 (μM)  | - | - | -   | 1 | 15 | 20 | - | -  | -  | - | - | -  | - |
| Comp 17 (μM) | - | - | -   | - | -  | -  | 1 | 10 | 15 | - | - | -  | - |
| Comp 18 (μM) | - | - | -   | - | -  | -  | - | -  | -  | 1 | 5 | 10 | - |

P53:

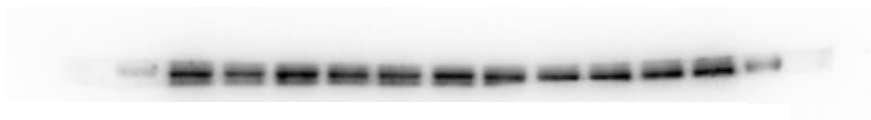

|              |   |   |     |   |    |    |   |    |    |   |   |    |   |
|--------------|---|---|-----|---|----|----|---|----|----|---|---|----|---|
| Marker       | + | - | -   | - | -  | -  | - | -  | -  | - | - | -  | + |
| DMSO         | - | + | +   | + | +  | +  | + | +  | +  | + | + | +  | - |
| CPT (nM)     | - | - | 200 | - | -  | -  | - | -  | -  | - | - | -  | - |
| Comp 6 (μM)  | - | - | -   | 1 | 15 | 20 | - | -  | -  | - | - | -  | - |
| Comp 17 (μM) | - | - | -   | - | -  | -  | 1 | 10 | 15 | - | - | -  | - |
| Comp 18 (μM) | - | - | -   | - | -  | -  | - | -  | -  | 1 | 5 | 10 | - |

CHK1:

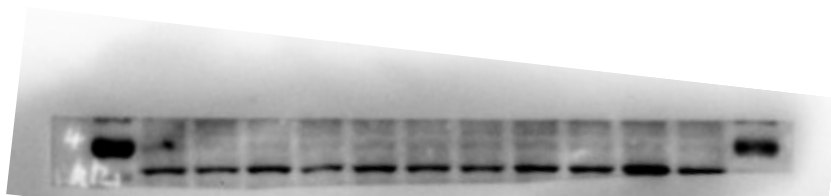

|              |   |   |     |   |    |    |   |    |    |   |   |    |   |
|--------------|---|---|-----|---|----|----|---|----|----|---|---|----|---|
| Marker       | + | - | -   | - | -  | -  | - | -  | -  | - | - | -  | + |
| DMSO         | - | + | +   | + | +  | +  | + | +  | +  | + | + | +  | - |
| CPT (nM)     | - | - | 200 | - | -  | -  | - | -  | -  | - | - | -  | - |
| Comp 6 (μM)  | - | - | -   | 1 | 15 | 20 | - | -  | -  | - | - | -  | - |
| Comp 17 (μM) | - | - | -   | - | -  | -  | 1 | 10 | 15 | - | - | -  | - |
| Comp 18 (μM) | - | - | -   | - | -  | -  | - | -  | -  | 1 | 5 | 10 | - |

$\beta$ -actin:

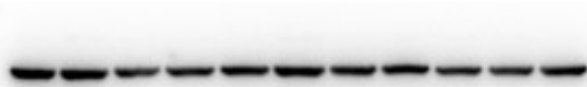

|                    |   |   |     |   |    |    |   |    |    |   |   |    |   |
|--------------------|---|---|-----|---|----|----|---|----|----|---|---|----|---|
| Marker             | + | - | -   | - | -  | -  | - | -  | -  | - | - | -  | + |
| DMSO               | - | + | +   | + | +  | +  | + | +  | +  | + | + | +  | - |
| CPT (nM)           | - | - | 200 | - | -  | -  | - | -  | -  | - | - | -  | - |
| Comp 6 ( $\mu$ M)  | - | - | -   | 1 | 15 | 20 | - | -  | -  | - | - | -  | - |
| Comp 17 ( $\mu$ M) | - | - | -   | - | -  | -  | 1 | 10 | 15 | - | - | -  | - |
| Comp 18 ( $\mu$ M) | - | - | -   | - | -  | -  | - | -  | -  | 1 | 5 | 10 | - |

**The third group:**

ATM:

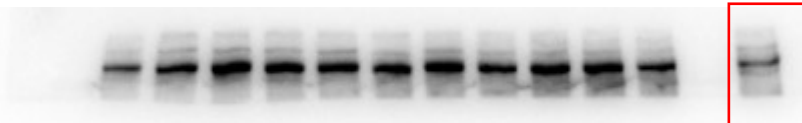

|                    |   |   |     |   |    |    |   |    |    |   |   |    |   |
|--------------------|---|---|-----|---|----|----|---|----|----|---|---|----|---|
| Marker             | + | - | -   | - | -  | -  | - | -  | -  | - | - | -  | + |
| DMSO               | - | + | +   | + | +  | +  | + | +  | +  | + | + | +  | - |
| CPT (nM)           | - | - | 200 | - | -  | -  | - | -  | -  | - | - | -  | - |
| Comp 6 ( $\mu$ M)  | - | - | -   | 1 | 15 | 20 | - | -  | -  | - | - | -  | - |
| Comp 17 ( $\mu$ M) | - | - | -   | - | -  | -  | 1 | 10 | 15 | - | - | -  | - |
| Comp 18 ( $\mu$ M) | - | - | -   | - | -  | -  | - | -  | -  | 1 | 5 | 10 | - |

The molecular weight of ATM is similar to that of ATM. The protein was run separately under the same conditions. The last hole of the protein band is the band generated by the remaining sample after adding high doses of compound 18. The bands of CHK1 and P53 are

ATR:

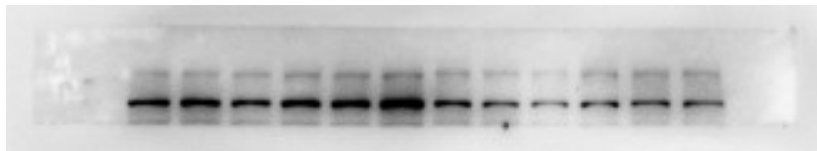

|                    |   |   |     |   |    |    |   |    |    |   |   |    |   |
|--------------------|---|---|-----|---|----|----|---|----|----|---|---|----|---|
| Marker             | + | - | -   | - | -  | -  | - | -  | -  | - | - | -  | + |
| DMSO               | - | + | +   | + | +  | +  | + | +  | +  | + | + | +  | - |
| CPT (nM)           | - | - | 200 | - | -  | -  | - | -  | -  | - | - | -  | - |
| Comp 6 ( $\mu$ M)  | - | - | -   | 1 | 15 | 20 | - | -  | -  | - | - | -  | - |
| Comp 17 ( $\mu$ M) | - | - | -   | - | -  | -  | 1 | 10 | 15 | - | - | -  | - |
| Comp 18 ( $\mu$ M) | - | - | -   | - | -  | -  | - | -  | -  | 1 | 5 | 10 | - |

The molecular weight of ATR is similar to that of ATM. The protein was run separately under the same conditions.

P53:

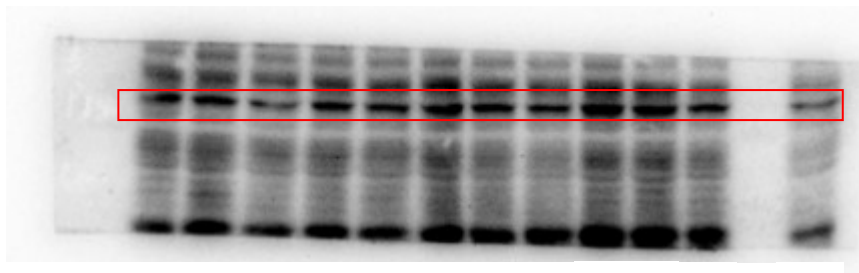

This protein band is P53.

|              |   |   |     |   |    |    |   |    |    |   |   |    |   |
|--------------|---|---|-----|---|----|----|---|----|----|---|---|----|---|
| Marker       | + | - | -   | - | -  | -  | - | -  | -  | - | - | +  | - |
| DMSO         | - | + | +   | + | +  | +  | + | +  | +  | + | + | -  | + |
| CPT (nM)     | - | - | 200 | - | -  | -  | - | -  | -  | - | - | -  | - |
| Comp 6 (μM)  | - | - | -   | 1 | 15 | 20 | - | -  | -  | - | - | -  | - |
| Comp 17 (μM) | - | - | -   | - | -  | -  | 1 | 10 | 15 | - | - | -  | - |
| Comp 18 (μM) | - | - | -   | - | -  | -  | - | -  | -  | 1 | 5 | 10 | - |

CHK1:

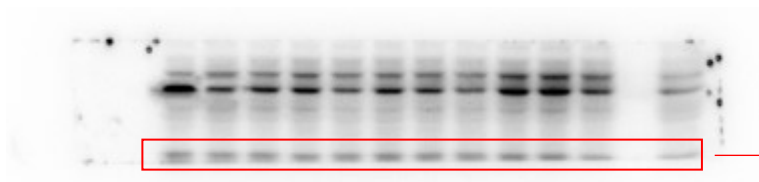

The protein band is a fragmented  $\beta$ -actin band that has been clipped, and this group of  $\beta$ -actin was repeated.

|              |   |   |     |   |    |    |   |    |    |   |   |    |   |
|--------------|---|---|-----|---|----|----|---|----|----|---|---|----|---|
| Marker       | + | - | -   | - | -  | -  | - | -  | -  | - | - | +  | - |
| DMSO         | - | + | +   | + | +  | +  | + | +  | +  | + | + | -  | + |
| CPT (nM)     | - | - | 200 | - | -  | -  | - | -  | -  | - | - | -  | - |
| Comp 6 (μM)  | - | - | -   | 1 | 15 | 20 | - | -  | -  | - | - | -  | - |
| Comp 17 (μM) | - | - | -   | - | -  | -  | 1 | 10 | 15 | - | - | -  | - |
| Comp 18 (μM) | - | - | -   | - | -  | -  | - | -  | -  | 1 | 5 | 10 | - |

$\beta$ -actin:

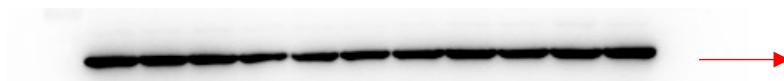

The  $\beta$ -actin band was cut into the CHK1 band, so  $\beta$ -actin was tested separately under the same conditions.

|              |   |   |     |   |    |    |   |    |    |   |   |    |   |
|--------------|---|---|-----|---|----|----|---|----|----|---|---|----|---|
| Marker       | + | - | -   | - | -  | -  | - | -  | -  | - | - | -  | + |
| DMSO         | - | + | +   | + | +  | +  | + | +  | +  | + | + | +  | - |
| CPT (nM)     | - | - | 200 | - | -  | -  | - | -  | -  | - | - | -  | - |
| Comp 6 (μM)  | - | - | -   | 1 | 15 | 20 | - | -  | -  | - | - | -  | - |
| Comp 17 (μM) | - | - | -   | - | -  | -  | 1 | 10 | 15 | - | - | -  | - |
| Comp 18 (μM) | - | - | -   | - | -  | -  | - | -  | -  | 1 | 5 | 10 | - |
